# 1 **Transcriptome analysis of Tartary buckwheat revealed differentially** 2 **expressed genes in salt pathway**

3 Jin-Nan Song<sup>\*</sup>, Xue-Hua Liu<sup>\*</sup>, Ya-Qi Wang, Hong-Bing Yang

4 *Key Lab of Plant Biotechnology in Universities of Shandong Province, College of Life Sciences, Qingdao*  
5 *Agricultural University, Qingdao, 266109, China.*

6 Address: No.700 Changcheng Road, Chengyang District, Qingdao, China.

7 Post Code: 266109.

8 <sup>\*</sup> These authors contributed equally to this work.

9 Author for correspondence: Hong-Bing Yang. e-mail: [hbyang@qau.edu.cn](mailto:hbyang@qau.edu.cn)

10

## 11 **ABSTRACT**

12 Tartary buckwheat (*Fagopyrum tataricum*) is a kind of annually herbaceous crop with higher content of  
13 rutin and flavonoids than other crops. Through transcriptome analysis to reveal the differentially expressed  
14 genes in salt pathway, the salt tolerance mechanism of Tartary buckwheat was studied. Two varieties and  
15 two new strains of Tartary buckwheat were used as experimental materials, and 100 mM was used as  
16 concentration of NaCl for treatment. We *de novo* assembled the reads into a transcriptome dataset  
17 containing 62,637 unigenes with N50 length of 1596 bp. A total of 205.23 million clean reads were  
18 obtained, and 33,495 (53.47%) of them were annotated. GO and KEGG classification suggested that the  
19 enrichment of these unigenes was in 47 sub-categories, 25 KOG functional categories and 129 pathways,  
20 respectively. By comparisons among 11 groups, we got many differentially expressed genes (DEGs) of  
21 transcriptome data in 8 samples. The GO classification showed that many DEGs between samples encoding  
22 for biological process, cellular component and molecular function pathway. These processes may be related  
23 to salt tolerance mechanism in Tartary buckwheat, which will provide valuable reference genetic  
24 information for the study on salt tolerance mechanism in plants and cultivating strong salt-tolerant varieties  
25 of Tartary buckwheat for more yield in saline-alkali soil. In addition, the relative expression of  
26 *Unigene0009545* and *Unigene0057231* in M1 and that of *Unigene0023096* and *Unigene0060321* in M2  
27 was increased significantly under salt stress. We speculate that these four genes of new strains in Tartary  
28 buckwheat may be related to salt tolerance.

29 **Keywords:** Tartary buckwheat, transcriptome data, differential expression genes, salt tolerance

30 **SUMMARY Heading:** Transcriptome analysis of Tartary buckwheat

## 31 **1. Introduction**

32 Buckwheat (*Fagopyrum esculentum* Moench) belongs to Polygonaceae, is a kind of dicotyledon plant.  
33 It originates from the Southwest in China at the early time, after that, it spreads to other countries gradually  
34 [1]. It has about 20 varieties, most of them are grown in mountain areas, such as Chuanqiao NO.1, which  
35 grows in Sichuan Province of China. In some areas, it used to be a crop because it contained some nutrients.  
36 Common buckwheat (*F. esculentum* Moench) and Tartary buckwheat (*F. tataricum* L. Gaertn.) are used for  
37 food [2], both are suitable for daily diet. Some studies have shown that Tartary buckwheat is more  
38 nutritious than common buckwheat [3].

39 As a serious global problem, soil salinity is threatening land productivity. It is estimated that 50% of  
40 cultivated land will be affected by this problem by the year of 2050 [4]. When crops are exposed to salt  
41 stress, the function of crops will be damaged to a certain extent. Therefore, salt stress can restrict crop  
42 growth and consequently reduce agricultural yield [5]. In addition, high salinity will increase Na<sup>+</sup> content  
43 and destroy the transmission system. More importantly, once plants suffered sodium toxicity, tissues at  
44 different levels will be damaged or even destroyed [6]. Under this severe salt stress, a large number of  
45 salt-related genes are highly expressed.

46 By using RNA-seq technology, we can identify almost all RNAs with very small deviation, get more  
47 current data and directly measure gene expression level [7]. Compared with other sequence-based methods,  
48 such as Sanger sequencing or EST Library of cDNA, this popular technology has many advantages,  
49 including more accuracy, simplicity and sensitivity [8]. Through this useful technology, we studied the  
50 transcriptome of Tartary buckwheat and established the transcriptome database of salt-related genes in  
51 Tartary buckwheat. On the basis of understanding the transcriptome information of Tartary buckwheat,  
52 more salt-related components and more comprehensive transcriptome letters were obtained. The aim was to  
53 investigate the expression of important genes in Tartary buckwheat under salt stress.

## 54 **2. Materials and Methods**

### 55 **2.1. Materials treatment and RNA extraction**

56 Two varieties of Chuanqiao NO.1 (WT1) and Chuanqiao NO.2 (WT2) and two new strains of  
57 Chuanqiao NO.1-1 (M1) and Chuanqiao NO.2-1 (M2) were used as experimental materials. All of them  
58 belonged to Tartary buckwheat type. M1 and M2 are new strains of WT1 and WT2 selected five years after  
59 natural mutagenesis in saline-alkali soil, and the salt tolerance of M1 and M2 is obviously higher than that  
60 of WT1 and WT2. The experimental groups were treated with Hoagland nutrient solution containing 100

61 mM NaCl at the stage of 2 leaves and 1 center leaf, while the control groups were treated with Hoagland  
62 nutrient solution without NaCl. Samples were then taken at 0 and 48 hours of processing time. The total  
63 RNA was isolated from each sample using Trizol (Life technologies) reagent following the protocol of the  
64 manufacturer, and the quality and quantity of the RNA were assessed by NanoDrop 2000.

## 65 **2.2. RNA library construction and sequencing**

66 After got the total RNA, the magnetic beads with Oligo (dT) were used to enrich the eukaryotic  
67 mRNA, then added fragmentation buffer to break the mRNA short (200~700 nt). Having gotten these  
68 mRNA, we used them to synthesize the first strand cDNA with random hexamers. The related buffer,  
69 dNTPs, RNase H and DNA polymerase I in one reaction was used to synthesize the second-strand cDNA.  
70 With the help of QiaQuick PCR extraction kit for purifying, we added EB buffer solution to the end  
71 repair, added poly (A) and connected the sequencing connector, and agarose gel electrophoresis was used  
72 for fragment size selection. Finally, we put these fragments to do PCR amplification. The libraries were  
73 sequenced using the Illumina HiSeq 2000 instrument.

## 74 **2.3. Data quality control and sequences assembly**

75 To get high quality clean reads, we do the following steps: (1) remove the adaptors, (2) remove the  
76 reads which contain more than 10% nucleotides (N), (3) remove the low quality reads ( $Q\text{-value} \leq 5$ ).

77 With the help of assembling software called Trinity [9], we assembled the short reads as transcriptome  
78 start, then this software linked the reads with some overlaps to longer segments, these segments with no  
79 nucleotides (N), afterwards we assembled these segments into a series of sequences, which were defined as  
80 unigenes, they were used to react functional annotation and coding sequence (CDS) prediction.

## 81 **2.4. Functional annotation and classification**

82 Using the BLASTx (evalue < 0.00001), all assembled unigenes were searched against the databases of  
83 NCBI Nr, Swiss-Prot, COG and KEGG. KEGG is a database on genome decoding, it can analyze the  
84 pathway of gene products in cell and function of these gene products, we can obtain the pathway annotation  
85 of unigene according to the KEGG annotation information [10]. GO (Gene Ontology) is a collaborative  
86 tool that can solve the collective information [11]. We took the *Fagopyrum tataricum* genes under the GO  
87 (<http://www.geneontology.org/>) classifications, they were divided into 3 classes of type: biological process,  
88 cellular component and molecular function. Nr (<http://www.ncbi.nlm.nih.gov>) and SwissProt are two  
89 well-known protein databases, and the latter one was strictly filtered to be redundant. Through them we can  
90 get more information for function and the highest sequence similarity of protein [12]. COG/KOG

91 (<http://www.ncbi.nlm.nih.gov/COG>) is a database which can treat the gene products with direct  
92 homologous classification. It is constructed based on bacteria, algae and eukaryotic organisms that have the  
93 whole genome encoding protein and the system evolution [13].

## 94 **2.5. Identification of transcription factor families and SSRs**

95 The identifications of transcription factors (TF) were analyzed by PlantTFcat online tool  
96 (<http://plantgrn.noble.org/PlantTFcat>) [14]. SSRs (Simple Sequence Repeats), one of molecular markers, it  
97 is a potent tool for genetic study and marker assisted selection (MAS) in many crops [15,16]. In addition, in  
98 this research, we adopted MISA search tool for SSRs screening [17].

## 99 **2.6. Analysis of differentially expressed genes (DEGs)**

100 To identify differentially expressed genes across samples or groups, the edgeR package  
101 (<http://www.r-project.org/>) was used. We identified genes with a fold change  $\geq 2$  and a false discovery rate  
102 (FDR)  $< 0.05$  in a comparison as significant DEGs. DEGs were then subjected to enrichment analysis of  
103 GO functions and KEGG pathways.

104 In order to verify the correctness of RNA-seq, we utilized the RT-qPCR to get the relative expression  
105 level on related genes which we took care of. Based on the quantity of RNA, we got the cDNA by reverse  
106 transcription reactions with a kit called PrimeScript RT reagent Kit with gDNA Eraser (Takara Biotech,  
107 Dalian, China), the *actin* gene was used as internal controls, which was the *actin* of Tartary buckwheat. The  
108 primers were designed by NCBI and were synthesized by Tsingke company. The real time PCR program  
109 consisted at 94°C for 30 s, 40 cycles of denaturing at 95°C for 10 s, annealing and extension at 58°C for 20  
110 s. Finally, data processing and statistical analysis were used the  $2^{-\Delta\Delta Ct}$  method [18] to analyse the relative  
111 expression level of genes.

## 112 **3. Results**

### 113 **3.1. De novo assembly, classification of clean reads in each sample**

114 As shown in Table 1, the total number of genes was 62,637, and the total GC percentage was 41.20%.  
115 The length of N50 was 1,596 bp, revealing that the assembly quality was not half bad, so we could take use  
116 of the assembly results to carry out the next experiments. In addition, we got the length distribution graph  
117 of 8 samples summary, the length of most genes was between 200 bp to 299 bp, and the number of genes  
118 was about 16,857 (Fig. 1; 2).

119 A total of 209,158,434 raw reads were generated, after filtering the reads, we got a total of 205, 227,  
120 656 clean reads, the Q20 value of all clean reads was over 97%, and the Q30 value was over 94%. All clean

121 reads had been deposited into the Sequence Read Archive (SRA) under the accession of PRJNA418602,  
122 NCBI (<https://www.ncbi.nlm.nih.gov/geo/>).

### 123 **3.2. Unigene Functional Annotation**

#### 124 **3.2.1 . Four big database annotation statistics**

125 We got the whole of 62,637 unigenes, which were searched against 4 main databases, including Nr,  
126 Swissprot, KOG and KEGG, the final annotated results were showed in [Table 2](#). Among the whole unigenes,  
127 33,495 unigenes (53.47%) were annotated, while 29,142 unigenes(46.53%) could not be annotated in any  
128 databases. Among the annotated unigenes, 33,158 unigenes (52.94%) were in Nr database, which contained  
129 non-redundant protein sequence with entries based on BLAST tool [[19](#)], 25,430 unigenes (40.60%) were in  
130 Swissprot database, and 21,489 unigenes (34.31%) and 13,620 unigenes (21.74%) were in KOG [[18](#)] and  
131 KEGG [[20](#)] database, respectively. As shown in [Fig. 3](#), 10,865 unigenes could be annotated in four  
132 databases, so it gave us a notice that these unigenes might be superbly vital to life activities in Tartary  
133 buckwheat.

#### 134 **3.2.2. Distribution statistics of near source varieties analysis**

135 Homologous sequences means some similar sequences or some sequences can be somewhat compared  
136 with. If two aligned unigenes had many accordant sequences, they might have similar functions [[21](#)]. As  
137 shown in [Fig. 4](#), compared with *Fagopyrum tataricum*, the largest number of homologous sequences was  
138 *Beta vulgaris* subsp. *vulgaris*, which had 6,195 homologous unigenes, the second was *Vitis vinifera* with  
139 2,984 homologous unigenes, and the third was *Theobroma cacao* with 2,299 homologous unigenes.

#### 140 **3.2.3. KOG function and gene ontology (GO) classification of unigenes**

141 The KOG database is a protein pool which contains many secondary databases, it has a lot of  
142 sequences classified into functional categories, and it has 78,096 protein databases, where 24,154 proteins  
143 from *Arabidopsis thaliana* (Ath), 17,101 from *Caenorhabditis elegans* (Cel), 10,517 from *Drosophila*  
144 *melanogaster* (Dme) and 26,324 from *Homo sapiens* (Hsa) [[22](#)]. Among the 62,637 unigenes in the final set,  
145 21,489 unigenes were annotated and classified into 25 KOG categories, the largest group of unigenes  
146 (5,243 members, 21.97%) was assigned to the R class (General function prediction only); T class (Signal  
147 transduction mechanisms) accounted for 2,675 unigenes (11.21%); O class (Posttranslational modification,  
148 protein turnover, chaperones) accounted for 2,326 unigenes (9.75%); with the number of 9 unigenes  
149 (0.038%), N class (Cell motility) was the smallest ([Fig. 5](#); [Table S1](#)). It is known that different varieties  
150 have different conditions so that they can yield a large of different classifications [[23](#)]. We may find some

151 useful genes in V class (defense mechanisms) of salt-stress buckwheat. This will be of value for future  
152 studies on salt-stress mechanism in *Fagopyrum tataricum* (L.) Gaertn.

153 With the help of BLAST2 GO software, we completed the search of GO database and facilitation of  
154 global analysis of gene expressions. GO classification was carried on the annotated unigenes which showed  
155 that mainly involved three biological functions: 59,409 (94.85%) unigenes annotated to “biological  
156 process”, 37,902 (60.51%) unigenes annotated to “cell component”, 21,526 (34.37%) unigenes annotated to  
157 “molecular function” (Table S2).

158 Using the GO function classification, the global unigenes in 3 biological function categories were  
159 divided into 47 biological function subgroups. Among the global GO classifications, the most number of  
160 genes is in “metabolic process”, which is assigned with 12,473 (21.00%) unigenes, while that in cellular  
161 component is “cell”, which is assigned with 9,128 (24.08%) unigenes, and that in molecular function is  
162 “catalytic activity”, which is assigned with 10,560 unigenes (49.06%) (Fig. 6; Table S2).

#### 163 3.2.4. SSR analysis of *F. tataricum*

164 We identified 3,355 SSRs obtained from 62,637 sequences totaling 56,788,193 bp. A total of 3,025  
165 sequences contained SSRs, in which 289 sequences contained more than a single SSR, and 121 SSRs  
166 exhibited in compound formation. The most abundant SSR type was tri-nucleotide (1588, 47.33%),  
167 followed by di-nucleotide (1234, 36.78%), tetra-nucleotide (294, 8.76%), hexa-nucleotide (144, 4.29%) and  
168 penta-nucleotide (95, 2.84%) (Table 3).

169 The repeat counts range from 4 to 15+. SSRs with 5 repeats were being the most abundant, followed  
170 by those with 6 repeats. Among the whole SSRs, AT/AT was the most abundant motif (20.10%), followed  
171 by AAG/CTT (14.10%), and the third was AG/CT (13.40%). The results were better comparing to the SSRs  
172 and GC distributions in *Arabidopsis* [24]. We believed that our analysis could provide a solid foundation  
173 for the future study (Fig. 7).

#### 174 3.2.5. Identification of differentially expressed genes

175 Aimed at 8 samples, we obtained the expression profile data by RNA-seq, some salt-related genes  
176 predicted to participate in this salt stress process. We got many DEGs (differentially expressed genes). As  
177 shown in Fig. 8, green pillar meant that relative expressions were down regulated, red pillar meant that  
178 relative expressions were up regulated. For getting an intuitional view between control and NaCl solution  
179 treatment, we tidied up the raw data and made Venn diagrams (Fig. 9). There were 42 (0.30%) common  
180 unigenes in four groups, which mostly showed that these 42 unigenes were all salt-related. The detailed

181 unigenes were showed in [Table S3](#).

### 182 **3.2.6. The differences between samples expresses in GO/Pathway**

183 We completed GO term enrichment by Blast2GO for further understanding the biological function of  
184 DEGs. Most of up-going DEGs under salt treatment were abundant in ‘cell morphogenesis’, ‘cellular  
185 component morphogenesis’, ‘oxidation-reduction process’, ‘catalytic activity’, ‘cellular process’,  
186 ‘metabolic process’, ‘single-organism process’, ‘binding’ and ‘cell part’. And the down-going DEGs under  
187 salt treated conditions were ‘growth’, ‘localization’, ‘cellular component organization or biogenesis’,  
188 ‘catalytic activity’, ‘membrane part’ and ‘organelle part’. These results suggest that the biological functions  
189 of Tartary buckwheat may be activated by salt stress ([Fig. 10 A-D](#); [Table S4 A-D](#)).

190 For further predicting which pathways these DEGs may be involved in, we conducted KEGG  
191 enrichment analysis. The consequences revealed that the DEGs were overrepresented in pathway terms  
192 ‘Plant hormone signal transduction’, ‘Biosynthesis of secondary metabolites’ and ‘Metabolic pathways’  
193 ([Fig. 11 A-D](#); [Table S5 A-D](#)).

### 194 **3.2.7. Identification of transcription factor families**

195 Transcription factors (TF) usually played vital roles in growth and development processes of plants.  
196 Collecting data indicated that many TF families were involved in abiotic stress responses [25]. Though  
197 PlantTFcat online tool, we identified 57 transcription factor families, including 7,208 unigenes. The top of  
198 10 most families were bHLH (741, 10.28%), NAC (541, 7.51%), MYB (430, 5.97%), WRKY (372, 5.16%),  
199 B3 (360, 4.99%), FAR1 (320, 4.44%), ERF (314, 4.36%), C3H (301, 4.18%), bZIP (296, 4.11%) and C2H2  
200 (288, 4.00%) ([Fig. 12](#); [Table S6](#)).

### 201 **3.2.8. Verification of differentially expressed genes by Real-Time PCR**

202 To validate the facticity of expression profile data obtained by RNA-Seq, we carried out real-time  
203 PCR analysis on nine unigenes which were related to salt stress: SOD [26], POD [27], APX [28],  
204 SR(salt-related), Na<sup>+</sup>/H<sup>+</sup> [29] and SOS (salt overly sensitive) [30]. The SOD-related genes contained  
205 *Unigene0023096* and *Unigene0017446*, the POD-related genes contained *Unigene0011757* and  
206 *Unigene0057231*, the APX-related genes contained *Unigene0029688* and *Unigene0060321*, the SR  
207 (salt-related) gene contained *Unigene0009545*, the Na<sup>+</sup>/H<sup>+</sup> gene was *FtNHX1* of *Unigene0036375*, SOS  
208 (salt overly sensitive) gene was *Unigene0038654*. We got each primer ([Table 4](#)) from NCBI primer tool  
209 (<https://www.ncbi.nlm.nih.gov/tools/primer-blast/>). Also, we got the *Actin* [31] sequence of *F. tataricum*  
210 and the primer for RT-qPCR. They were chosen to act qualified by real-time PCR and were selected by

211 RNA-Seq analysis. The results showed that the expression data from RNA-seq were accurate and reliable  
212 (Table S7). In addition, Table S7 showed that the relative expression of *Unigene0009545* and  
213 *Unigene0057231* in M1 was increased significantly under salt stress compared with the control, which was  
214 increased by 99.74% and 294.61%, respectively, while that of *Unigene0023096* and *Unigene0060321* in  
215 M2 was increased significantly under salt stress compared with the control, which was increased by  
216 211.48% and 73.08%, respectively. Therefore, we speculate that these four genes of new strains in Tartary  
217 buckwheat may be related to salt tolerance.

## 218 4. Discussion

219 There are more than 1 billion  $\text{hm}^2$  of saline soil in the world [32]. However, saline soil is an important  
220 land resource. In addition, salinization can also reduce crop yields. Therefore, it is urgent to improve crop  
221 salt tolerance or reduce saline soil. On the former issue, the urgent research in recent years has focused on  
222 the mechanism of salt tolerance in plants [33]. On the latter issue, soil salinization assessment is the  
223 premise, which can reveal the basic situation of soil salinization in this area [34]. Prevention and control  
224 has become the mainstream method to reduce saline soil. In recent years, transcriptome analysis has  
225 become more and more popular, such as *maize* (*Zea mays* L.) [35] and *Spodoptera litura* [36], which  
226 provides a comprehensive survey of gene expression changes and some insights into specific biological  
227 processes [37]. On this basis, we carried out transcriptome analysis to understand the mechanism of salt  
228 response in Tartary buckwheat.

229 We previously found that Chuanqiao NO.1 was more salt tolerant than Chuanqiao NO.2, then planted  
230 them in saline soil and obtained two new strains: Chuanqiao NO.1-1 and Chuanqiao NO.2-1. By *de novo*  
231 technology study on two varieties and two new strains of Tartary buckwheat, we got 62,637 unigenes with  
232 N50 length of 1596 bp and total length of 56,788,193 bases. Assembly quality can be evaluated by N50  
233 value [38]. According to other reported transcriptome data, Wu et al. [39] found that the salt stress response  
234 transcriptome yielded 57,921 unigenes with N50 length of 1,400 bp and a total length of 44.5 Mb bases in *F.*  
235 *tataricum*. We totally obtained 62,637 assembly unigenes, 33,495 (53.47%) were annotated in four big  
236 databases, our high-throughput RNA-seq yielded more unigenes with slightly shorter N50, and the largest  
237 number of annotated unigenes was the ‘biological process’ group, with the number of 59,409 (94.85%).  
238 Also, ‘metabolic process’, ‘cellular process’, ‘single-organism process’ and ‘biological regulation’ were the  
239 top four GO sub-categories, and ‘metabolic process’ and ‘biological regulation’ were overrepresented under  
240 salt stress. Many genes are related to two stress reaction processes. In addition, the results of KOG



241 classification showed that metabolic pathways were overexpressed in terms of ‘General function prediction  
242 only’, ‘Posttranslational modification, protein turnover, chaperones’ and ‘Signal transduction mechanisms’.  
243 This provides more important information for the future study on molecular mechanism of salt tolerance in  
244 plants.

245 The comparison of gene expression patterns between control and salt treatment group: WT1-CK VS  
246 WT1-T, M1-CK VS M1-T, WT2-CK VS WT2-T, M2-CK VS M2-T, there were 4049 DEGs, 4167 DEGs,  
247 6752 DEGs and 2239 DEGs, respectively, all containing low and high expression genes. Then, we got 42  
248 common DGEs in the above groups. The number of DEGs in each sample was larger than that in  
249 *Arabidopsis* [40]. It indicated that these 42 common DEGs may be related to salt treatment.

250 As shown by the results of transcription factor (TF), bHLH [41], NAC [42], MYB [43] and WRKY  
251 [44] have the first four gene. That is to say, when exposed to salt stress, the transcription factors dealing  
252 with this stress belong to the aforementioned TF families. The results showed that many genes related to  
253 salt stress might be found in *F. tataricum*.

254 bHLH is an important transcription factor involved in some processes of environmental stress  
255 response [45]. *OrbHHLH2* was cloned from *Oryzara fipogon* Griff by Zhou et al. [46], which is highly  
256 homologous to ICE1 protein. We obtained 741 DEGs belonging to the bHLH transcription factor family,  
257 such as *Unigene0005747* and *Unigene0006105*. NAC protein was unique and numerous to plants, the  
258 researches showed that the transcription factor had a number of functions in some ways. A large amount of  
259 evidence indicated that NAC transcription factors activated or inhibited target gene expression in biological  
260 damage, such as pathogen infection and other biological damage, such as high salt, drought, low  
261 temperature, ABA and mechanical damage, etc. Also, this transcription factor was related to salt stress.  
262 Ganesan et al. [47] found that *AmNAC1* played an important role in early salt stress response and long-term  
263 salt regulation in mangrove plant *Avicennia marina*. A total of 541 DEGs were obtained, such as  
264 *Unigene0031578*, *Unigene0033494*, etc, belonging to the NAC transcription factor family. As an important  
265 transcription factor, they may play important roles in salt tolerance of *F. tataricum*. MYB transcription  
266 factors are related to plant development, secondary metabolism, hormone signal transduction, disease  
267 resistance and abiotic stress tolerance [48]. According to the study of Zhang et al. [49] in *Arabidopsis*, high  
268 salt stress activates MYB-related gene *AtMYBL* that is highly expressed. *Unigene0027989* and  
269 *Unigene0027988* are the most important expression genes. They belong to the MYB transcription factor  
270 family. We can obtain many genes that response to MYB transcription factor of *F. tataricum* under salt

271 stress. As an important transcription factor superfamily, WRKY transporters are involved in response to  
272 environmental stimuli, such as high salt, low temperature, etc [50]. This transcription factor in *F. tataricum*  
273 is highly expressed under salt stress, which has the complexity and importance of stress regulation.  
274 *Unigene0043192*, *Unigene0043195* and *Unigene0043300* in *F. tataricum* have high similarity in *Oryza*  
275 *barthii*, and they are highly expressed under salinity stress. In conclusion, bHLH, NAC, MYB and WRKY  
276 are the most common transcription factors under salt stress in *F. tataricum*. Therefore, we can conclude that  
277 among these four transcription factors, more salt-related genes can be found, which work together to  
278 respond to salt stress in *F. tataricum*.

279 Salt stress increased the activities of antioxidant enzyme (SOD, POD, APX) and improved the  
280 adaptability of plants to adversity, such as cotton [51] and maize [52]. The relative expression levels of  
281 *NHX1* and *SOS1* genes were increased, such as the overexpression of *AeNHX1* gene in *Arabidopsis* plants  
282 [53], which could improve the salt tolerance of *Arabidopsis thaliana*; *SOS1* could also improve the salt  
283 tolerance in *S. pombe* [54]. The corresponding genes were higher expressed in *F. tataricum*. In addition, the  
284 expression levels of *FtNHX1* and *FtSOS1* were higher under salt stress. These salt-related genes were found  
285 and clarified in *F. tataricum*, which helps us understand the salt tolerance mechanism in plants. The salt  
286 tolerance of new strains Chuanqiao No.1-1 and Chuanqiao No.2-1 was higher than that of the original  
287 varieties. Under salt stress, the relative expression of *Unigene0009545* and *Unigene0057231* in Chuanqiao  
288 No.1-1 and that of *Unigene0023096* and *Unigene0060321* in Chuanqiao No.2-1 was increased significantly.  
289 The high salt tolerance of new strains in Tartary buckwheat may be related to the high expression of these  
290 four genes.

## 291 **5. Conclusion**

292 Though *de novo*, we generated and annotated a salt-responsive transcriptome of *F. tataricum*. Though  
293 RNA-seq, we obtained the DEGs of 8 samples. Genome-wide assay of the transcriptional differences  
294 between control and salt treatment group led to the identification of many key regulatory factors in salt  
295 reaction mechanism. We also found some genes related to antioxidant enzymes and important gene  
296 sequences under salt stress. In addition, we have selected two new salt-tolerant strains, which provide a  
297 more reasonable explanation for the study on salt tolerance mechanism. The results will help us to  
298 understand the salt tolerance mechanism in plants. The transcriptome data obtained can provide molecular  
299 and genomic information for future research.

300

## 301 **Contribution**

302 Song Jin-Nan analyzed the relative expression level of genes and drafted the manuscript; Liu Xue-Hua  
303 analyzed the transcriptome data of Tartary buckwheat; Wang Ya-Qi cultivated the plant and treated; Yang  
304 Hong-Bing designed the study and helped draft the manuscript. All authors gave final approval for  
305 publication.

## 306 **Acknowledgements**

307 The authors would like to acknowledge the financial support from the National Natural Science  
308 Foundation of China (31371552).

## 309 **Appendix A. Supplementary data**

310 Raw reads have been deposited to the NCBI Sequence Read Archive under the accession ID  
311 SRP125065: <https://www.ncbi.nlm.nih.gov/sra/?term=SRP125065>.

## 312 **References**

- 313 1 Fabjan N, Rode J, Košir IJ, Wang Z, Zhang Z, Kreft I. 2003 Tartary buckwheat (*Fagopyrum tataricum* Gaertn.) as a  
314 source of dietary rutin and quercitrin. *J. Agric. Food Chem.* **51**, 6452–6455. (doi:10.1021/jf034543e)
- 315 2 Bonafaccia G, Galli V, Francisci R, Mair V, Skrabanja V, Kreft I. 2000 Characteristics of spelt wheat products and  
316 nutritional value of spelt wheat-based bread. *Food Chem.* **68**, 437–441. (doi:10.1016/S0308-8146(99)00215-0)
- 317 3 Bonafaccia G, Gambelli L, Fabjan N, Kreft I. 2003 Trace elements in flour and bran from common and Tartary  
318 buckwheat. *Food Chem.* **83**, 1–5. (doi:10.1016/s0308-8146(03)00228-0)
- 319 4 Butcher K, Wick AF, Desutter T, Chatterjee A, Harmon J. 2016 Soil salinity: a threat to global food security. *Agron. J.*  
320 **108**, 2189–2200. (doi:10.2134/agronj2016.06.0368)
- 321 5 Li D, Su Z, Dong J, Wang T. 2009 An expression database for roots of the model legume *Medicago truncatula* under  
322 salt stress. *BMC Genomics* **10**, 517. (doi:10.1186/1471-2164-10-517)
- 323 6 Tester M, Davenport R. 2003 Na<sup>+</sup> tolerance and Na<sup>+</sup> transport in higher plants. *Ann. Bot.* **91**, 503–527.  
324 (doi:10.1093/aob/mcg058)
- 325 7 Trapnell C, Pachter L, Salzberg SL. 2009 TopHat: discovering splice junctions with RNA-Seq. *Bioinformatics* **25**,  
326 1105–1111. (doi:10.1093/bioinformatics/btp120)
- 327 8 Wang Z, Gerstein M, Snyder M. 2009 RNA-Seq: a revolutionary tool for transcriptomics. *Nat. Rev. Genet.* **10**, 57–63.  
328 (doi:10.1038/nrg2484)
- 329 9 Grabherr MG, Haas BJ, Yassour M, Levin JZ, Thompson DA, Amit I, Adiconis X, Fan L, Raychowdhury R, Zeng Q,  
330 Chen Z, Mauceli E, Hacohen N, Gnirke A, Rhind N, di Palma F, Birren BW, Nusbaum C, Lindblad-Toh K, Friedman N,

- 331 Regev A. 2011 Full-length transcriptome assembly from RNA-Seq data without a reference genome. *Nat. Biotechnol.*  
332 **29**, 644–652. (doi:10.1038/nbt.1883)
- 333 10 Kanehisa M, Goto S. 2000 KEGG: kyoto encyclopedia of genes and genomes. *Nucleic Acids Res.* **28**, 27–30.  
334 (doi:10.1093/nar/28.1.27)
- 335 11 Harris MA, Clark J, Ireland A, Lomax J, Ashburner M, Foulger R, Eilbeck K, Lewis S, Marshall B, Mungall C, Richter  
336 J, Rubin GM, Blake JA, Bult C, Dolan M, Drabkin H, Eppig JT, Hill DP, Ni L, Ringwald M, Balakrishnan R, Cherry  
337 JM, Christie KR, Costanzo MC, Dwight SS, Engel S, Fisk DG, Hirschman JE, Hong EL, Nash RS, Sethuraman A,  
338 Theesfeld CL, Botstein D, Dolinski K, Feierbach B, Berardini T, Mundodi S, Rhee SY, Apweiler R, Barrell D, Camon E,  
339 Dimmer E, Lee V, Chisholm R, Gaudet P, Kibbe W, Kishore R, Schwarz EM, Sternberg P, Gwinn M, Hannick L,  
340 Wortman J, Berriman M, Wood V, de la Cruz N, Tonellato P, Jaiswal P, Seigfried T, White R, Gene Ontology C. 2004  
341 The gene ontology (GO) database and informatics resource. *Nucleic Acids Res.* **32**, D258–261.  
342 (doi:10.1093/nar/gkh036)
- 343 12 Louie B, Higdon R, Kolker E. 2009 A statistical model of protein sequence similarity and function similarity reveals  
344 overly-specific function predictions. *PLoS One* **4**(10), e7546. (doi:10.1371/journal.pone.0007546)
- 345 13 Liu F, Sun X, Wang W, Liang Z, Wang F. 2014 De novo transcriptome analysis-gained insights into physiological and  
346 metabolic characteristics of *Sargassum thunbergii* (Fucales, Phaeophyceae). *J. Appl. Phycol.* **26**, 1519–1526.  
347 (doi:10.1007/s10811-013-0140-2)
- 348 14 Dai X, Sinharoy S, Udvardi M, Zhao PX. 2013 PlantTFcat: an online plant transcription factor and transcriptional  
349 regulator categorization and analysis tool. *BMC Bioinformatics* **14**, 321. (doi:10.1186/1471-2105-14-321)
- 350 15 Wei W, Qi X, Wang L, Zhang Y, Hua W, Li D, Lv H, Zhang X. 2011 Characterization of the sesame (*Sesamum indicum*  
351 L.) global transcriptome using Illumina paired-end sequencing and development of EST-SSR markers. *BMC Genomics*  
352 **12**, 451. (doi:10.1186/1471-2164-12-451)
- 353 16 Yang Z, Chen Z, Peng Z, Yu Y, Liao M, Wei S. 2017 Development of a high-density linkage map and mapping of the  
354 three-pistil gene (Pis1) in wheat using GBS markers. *BMC Genomics* **18**, 567. (doi:10.1186/s12864-017-3960-7)
- 355 17 Thiel T, Michalek W, Varshney RK, Graner A. 2003 Exploiting EST databases for the development and characterization  
356 of gene-derived SSR-markers in barley (*Hordeum vulgare* L.). *Theor. Appl. Genet.* **106**, 411–422.  
357 (doi:10.1007/s00122-002-1031-0)
- 358 18 Livak KJ, Schmittgen TD. 2001 Analysis of relative gene expression data using real-time quantitative PCR and the  
359  $2^{-\Delta\Delta CT}$  method. *Methods* **25**, 402–408. (doi:10.1006/meth.2001.1262)
- 360 19 Pruitt KD, Tatusova T, Maglott DR. 2007 NCBI reference sequences (RefSeq): a curated non-redundant sequence

- 361 database of genomes, transcripts and proteins. *Nucleic Acids Res.* **35**, D61–65. (doi:10.1093/nar/gki025)
- 362 20 Kanehisa M, Goto S, Sato Y, Furumichi M, Tanabe M. 2012 KEGG for integration and interpretation of large-scale  
363 molecular data sets. *Nucleic Acids Res.* **40**, D109–114. (doi:10.1093/nar/gkr988)
- 364 21 Thim L. 1988 A surprising sequence homology. *Biochem. J.* **253**, 309. (doi:10.1042/bj2530309a)
- 365 22 Mudado MA, Ortega JM. 2006 A picture of gene sampling/expression in model organisms using ESTs and KOG  
366 proteins. *Genet. Mol. Res.* **5**, 242–253. (doi:10.1590/S1415-47572006000200033)
- 367 23 Zhu Y, Wang X, Huang L, Lin C, Zhang X, Xu W, Peng J, Li Z, Yan H, Luo F, Wang X, Yao L, Peng D. 2017  
368 Transcriptomic identification of drought-related genes and SSR markers in sudan grass based on RNA-Seq. *Front. Plant  
369 Sci.* **8**, 687. (doi:10.3389/fpls.2017.00687)
- 370 24 Lawson MJ, Zhang L. 2006 Distinct patterns of SSR distribution in the *Arabidopsis thaliana* and rice genomes. *Genom.  
371 Biol.* **7**, R14. (doi:10.1186/gb-2006-7-2-r14)
- 372 25 Nakashima K, Yamaguchi-Shinozaki K. 2009 Transcriptional regulatory networks in response to abiotic stresses in  
373 *Arabidopsis* and grasses. *Plant Physiol.* **149**, 88–95. (doi:10.1104/pp.108.129791)
- 374 26 Askira Y, Rubin B, Rabinowitch HD. 1991 Differential response to the herbicidal activity of delta-aminolevulinic acid  
375 in plants with high and low SOD activity. *Free Radic. Res. Commun.* **13**(1), 837–843.  
376 (doi:10.3109/10715769109145865)
- 377 27 Shah K, Nahakpam S. 2012 Heat exposure alters the expression of SOD, POD, APX and CAT isozymes and mitigates  
378 low cadmium toxicity in seedlings of sensitive and tolerant rice cultivars. *Plant Physiol. Biochem.* **57**(3), 106–113.  
379 (doi:10.1016/j.plaphy.2012.05.007)
- 380 28 B i y i k İ, Aydın SS, Duman DC, Aras S. 2014 Expression analysis of APX and CAT genes in eggplants subjected to Cu<sup>+2</sup>  
381 and Zn<sup>+2</sup> heavy metals. *New Biotech.* **31**, S138. (doi:10.1016/j.nbt.2014.05.1956)
- 382 29 Krulwich TA. 1983 Na<sup>+</sup>/H<sup>+</sup> antiporters. *Biochim. Biophys. Acta* **726**, 245–264. (doi:10.1016/0304-4173(83)90011-3)
- 383 30 Little JW, Mount DW, 1982 The SOS regulatory system of *Escherichia coli*. *Cell* **29**, 11–22.  
384 (doi:10.1016/0092-8674(82)90085-X)
- 385 31 Mitchison TJ, Cramer LP. 1996 Actin-based cell motility and cell locomotion. *Cell* **84**, 371–379.  
386 (doi:10.1016/S0092-8674(00)81281-7)
- 387 32 Metternicht GI, Zinck JA. 2003 Remote sensing of soil salinity: potentials and constraints. *Remote Sens. Environ.* **85**,  
388 1–20. (doi:10.1016/S0034-4257(02)00188-8)
- 389 33 Belver A, Olias R, Huertas R, Rodriguez-Rosales MP. 2012 Involvement of SISOS2 in tomato salt tolerance.  
390 *Bioengineered* **3**, 298–302. (doi:10.4161/bioe.20796)

- 391 34 Letey J, Hoffman GJ, Hopmans JW, Grattan SR, Suarez D, Corwin DL, Oster JD, Wu L, Amrhein C. 2011 Evaluation  
392 of soil salinity leaching requirement guidelines. *Agric. Water Manage.* **98**, 502–506. (doi:10.1016/j.agwat.2010.08.009)
- 393 35 Jaiswal P. 2013 Maize metabolic network construction and transcriptome analysis. *Plant Genome* **6**, 1–12.  
394 (doi:10.3835/plantgenome2012.09.0025)
- 395 36 Gu J, Huang LX, Gong YJ, Zheng SC, Liu L, Huang LH, Feng QL. 2013 De novo characterization of transcriptome and  
396 gene expression dynamics in epidermis during the larval-pupal metamorphosis of common cutworm. *Insect Biochem.*  
397 *Mol. Biol.* **43**, 794–808. (doi:10.1016/j.ibmb.2013.06.001)
- 398 37 Nagalakshmi U, Waern K, Snyder M. 2010 RNA-Seq: a method for comprehensive transcriptome analysis. *Curr. Protoc.*  
399 *Mol. Biol.* **4**, 11–13. (doi:10.1002/0471142727.mb0411s89)
- 400 38 Makinen V, Salmela L, Ylisen J. 2012 Normalized N50 assembly metric using gap-restricted co-linear chaining. *BMC*  
401 *Bioinformatics* **13**(1), 255. (doi:10.1186/1471-2105-13-255)
- 402 39 Wu Q, Bai X, Zhao W, Xiang D, Wan Y, Yan J, Zou L, Zhao G. 2017 De novo assembly and analysis of Tartary  
403 buckwheat (*Fagopyrum tataricum* Gaertn.) transcriptome discloses key regulators involved in salt-stress response.  
404 *Genes* **8**(10), 255. (doi:10.3390/genes8100255)
- 405 40 Taji T, Seki M, Satou M, Sakurai T, Kobayashi M, Ishiyama K, Narusaka Y, Narusaka M, Zhu JK, Shinozaki K. 2004  
406 Comparative genomics in salt tolerance between *Arabidopsis* and *Arabidopsis*-related halophyte salt cress using  
407 *Arabidopsis* microarray. *Plant Physiol.* **135**(3), 1697–1709. (doi:10.1104/pp.104.039909)
- 408 41 Satou Y, Imai KS, Levine M, Kohara Y, Rokhsar D, Satoh N. 2003 A genomewide survey of developmentally relevant  
409 genes in *Ciona intestinalis* - I. Genes for bHLH transcription factors. *Dev. Genes Evol.* **213**, 213–221.  
410 (doi:10.1007/S00427-003-0319-7)
- 411 42 Olsen AN, Ernst HA, Leggio LL, Skriver K. 2005 NAC transcription factors: structurally distinct, functionally diverse.  
412 *Trends Plant Sci.* **10**, 79–87. (doi:10.1016/j.tplants.2004.12.010)
- 413 43 Dubos C, Stracke R, Grotewold E, Weisshaar B, Martin C, Lepiniec L. 2010 MYB transcription factors in *Arabidopsis*.  
414 *Trends Plant Sci.* **15**, 573. (doi:10.1016/j.tplants.2010.06.005)
- 415 44 Eulgem T, Somssich IE. 2007 Networks of WRKY transcription factors in defense signaling. *Curr. Opin. Plant Biol.* **10**,  
416 366–371. (doi:10.1016/j.pbi.2007.04.020)
- 417 45 Song XM, Huang ZN, Duan WK, Ren J, Liu TK, Li Y, Hou XL. 2014 Genome-wide analysis of the bHLH transcription  
418 factor family in Chinese cabbage (*Brassica rapa* ssp. *pekinensis*). *BMC Genomics* **289**, 77.  
419 (doi:10.1007/s00438-013-0791-3)
- 420 46 Zhou J, Li F, Wang JL, Ma Y, Chong K, Xu YY. 2009 Basic helix-loop-helix transcription factor from wild rice

- 421 (OrbHLH2) improves tolerance to salt- and osmotic stress in *Arabidopsis*. *J. Plant Physiol.* **166**, 1296–1306.  
422 ([doi:10.1016/j.jplph.2009.02.007](https://doi.org/10.1016/j.jplph.2009.02.007))
- 423 47 Ganesan G, Sankararamasubramanian HM, Narayanan JM, Sivaprakash KR, Parida A. 2008 Transcript level  
424 characterization of a cDNA encoding stress regulated NAC transcription factor in the mangrove plant *Avicennia marina*.  
425 *Plant Physiol. Biochem.* **46**, 928–934. ([doi:10.1016/j.plaphy.2008.05.002](https://doi.org/10.1016/j.plaphy.2008.05.002))
- 426 48 Allan AC, Hellens RP, Laing WA. 2008 MYB transcription factors that colour our fruit. *Trends Plant Sci.* **13**(3),  
427 99–102. ([doi:10.1016/j.tplants.2007.11.012](https://doi.org/10.1016/j.tplants.2007.11.012))
- 428 49 Zhang X, Ju HW, Chung MS, Huang P, Ahn SJ, Kim CS. 2011 The R-R-type MYB-like transcription factor, AtMYBL,  
429 is involved in promoting leaf senescence and modulates an abiotic stress response in *Arabidopsis*. *Plant Cell Physiol.* **52**,  
430 138–148. ([doi:10.1093/pcp/pcq180](https://doi.org/10.1093/pcp/pcq180))
- 431 50 Zhang C, Wang D, Yang C, Kong N, Zheng S, Peng Z, Nan Y, Nie T, Wang R, Ma H. 2017 Genome-wide identification  
432 of the potato WRKY transcription factor family. *PLoS One* **12**, e0181573. ([doi:10.1371/journal.pone.0181573](https://doi.org/10.1371/journal.pone.0181573))
- 433 51 Gossett DR, Millhollon EP, Lucas MC, Banks SW, Marney MM. 1994 The effects of NaCl on antioxidant enzyme  
434 activities in callus tissue of salt-tolerant and salt-sensitive cotton cultivars (*Gossypium hirsutum* L.). *Plant Cell Rep.* **13**,  
435 498–503. ([doi:10.1007/bf00232944](https://doi.org/10.1007/bf00232944))
- 436 52 Azooz MM, Ismail AM, Elhamd MFA. 2009 Growth, lipid peroxidation and antioxidant enzyme activities as a selection  
437 criterion for the salt tolerance of maize cultivars grown under salinity stress. *Int. J. Agric. Biol.* **11**, 572–577.  
438 ([doi:10.15439/2014F360](https://doi.org/10.15439/2014F360))
- 439 53 Qiao WH, Zhao XY, Li W, Luo Y, Zhang XS. 2007 Overexpression of AeNHX1, a root-specific vacuolar Na<sup>+</sup>/H<sup>+</sup>  
440 antiporter from *Agropyron elongatum*, confers salt tolerance to *Arabidopsis* and *Festuca* plants. *Plant Cell Rep.* **26**,  
441 1663–1672. ([doi:10.1007/s00299-007-0354-3](https://doi.org/10.1007/s00299-007-0354-3))
- 442 54 Ullah A, Dutta D, Fliegel L. 2016 Expression and characterization of the SOS1 *Arabidopsis* salt tolerance protein. *Mol.*  
443 *Cell Biochem.* **415**, 133–143. ([doi:10.1007/s11010-016-2685-2](https://doi.org/10.1007/s11010-016-2685-2))
- 444  
445  
446  
447  
448  
449  
450

## 451 **Legends**

452 Table 1. Characteristics of unigenes.

453 Table 2. Major characteristics in *de novo* assembled data of 8 samples.

454 Table 3. Type statistics of SSRs.

455 Table 4. Primer names and sequences of RT-qPCR.

456 Fig. 1. Length distribution of genes in *Fagopyrum tataricum*.

457 Fig. 2. Number of reads distribution in *Fagopyrum tataricum*.

458 Fig. 3. Four database annotation of Venn diagrams.

459 Fig. 4. Distribution statistics of near source varieties (Top 10).

460 Fig. 5. KOG function classification of *Fagopyrum tataricum* unigenes (Note: 21,489 unigenes are  
461 annotated and classified into 25 KOG categories from the final set of 62,637 unigenes).

462 Fig. 6. GO classification of unigenes in *Fagopyrum tataricum*.

463 Fig. 7. Distribution of SSR motifs in *Fagopyrum tataricum*.

464 Fig. 8. Different expression of genes among samples.

465 Fig. 9. DEGs among four groups of Venn diagrams.

466 Fig. 10A. GO classification of DEGs between WT1-CK and WT1-T.

467 Fig. 10B. GO classification of DEGs between M1-CK and M1-T.

468 Fig. 10C. GO classification of DEGs between WT2-CK and WT2-T.

469 Fig. 10D. GO classification of DEGs between M2-CK and M2-T.

470 Fig. 11A. KEGG classification of DEGs between WT1-CK and WT1-T.

471 Fig. 11B. KEGG classification of DEGs between M1-CK and M1-T.

472 Fig. 11C. KEGG classification of DEGs between WT2-CK and WT2-T.

473 Fig. 11D. KEGG classification of DEGs between M2-CK and M2-T.

474 Fig. 12. The top 10 numbers of TF classification statistics.

## 475 **Supplements**

476 Table S1. *Fagopyrum tataricum*-Unigene.fa.kog.class.annot.

477 Table S2. *Fagopyrum tataricum*-Unigene.fa.GO2gene.

478 Table S3. Common DEGs of four groups under salt stress.

479 Table S4A. Gene Ontology of DEGs between WT1-CK and WT1-T.

480 Table S4B. Gene Ontology of DEGs between M1-CK and M1-T.



481 Table S4C. Gene Ontology of DEGs between WT2-CK and WT2-T.  
482 Table S4D. Gene Ontology of DEGs between M2-CK and M2-T.  
483 Table S5A. Pathway annotation of DEGs between WT1-CK and WT1-T.  
484 Table S5B. Pathway annotation of DEGs between M1-CK and M1-T.  
485 Table S5C. Pathway annotation of DEGs between WT2-CK and WT2-T.  
486 Table S5D. Pathway annotation of DEGs between M2-CK and M2-T.  
487 Table S6. TF. Class.  
488 Table S7. Validation of RNA sequence (RNA-Seq) expression profiles by real-time PCR.  
489  
490  
491  
492  
493  
494  
495  
496  
497  
498  
499  
500  
501  
502  
503  
504  
505  
506  
507  
508  
509  
510

511

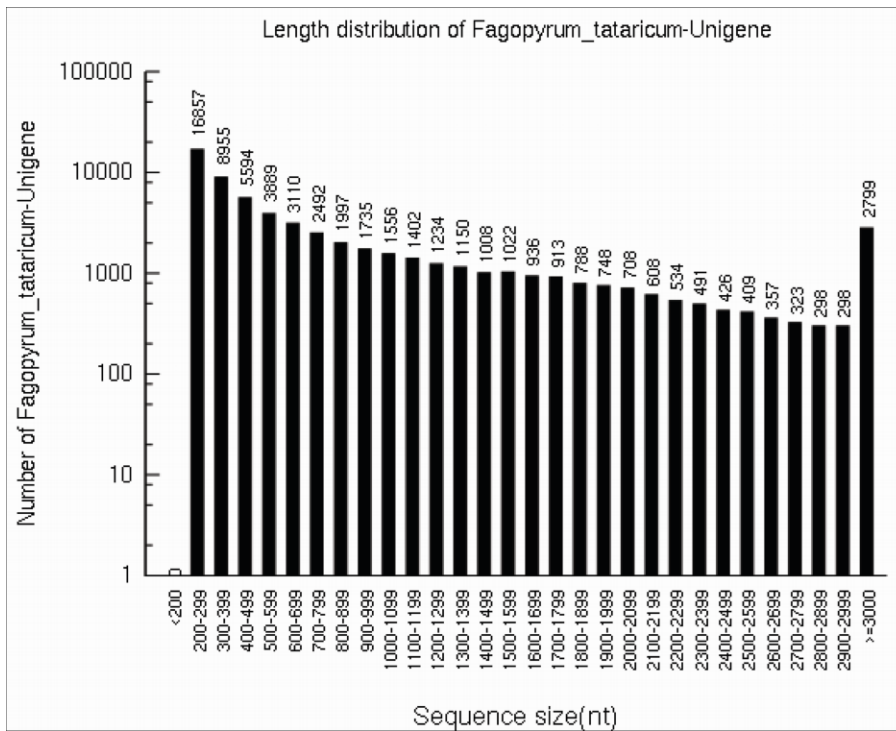

512

513

514 Fig. 1. Length distribution of genes in *Fagopyrum tataricum*.

515

516

517

518

519

520

521

522

523

524

525

526

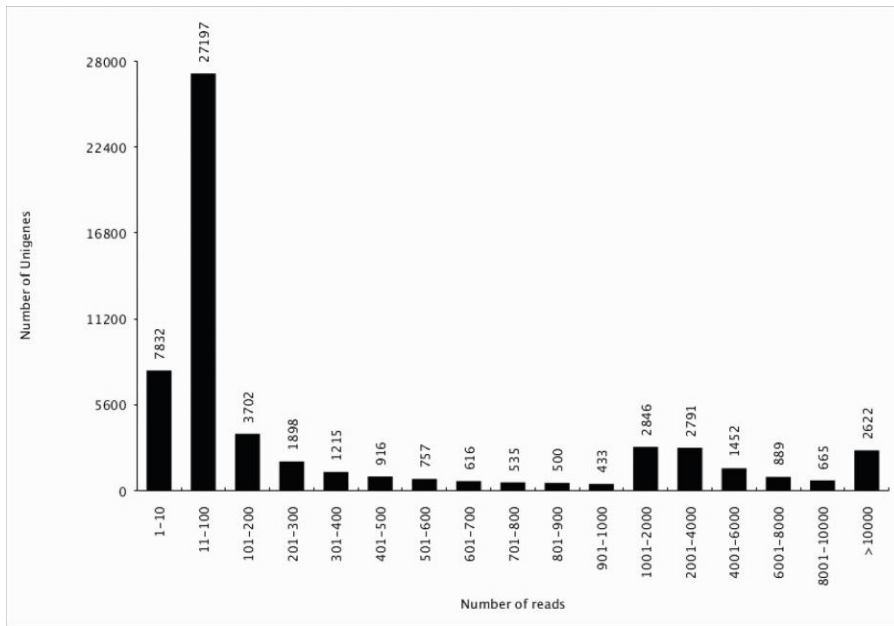

527

528

529 Fig. 2. Number of reads distribution in *Fagopyrum tataricum*.

530

531

532

533

534

535

536

537

538

539

540

541

542

543

544

545

546

547

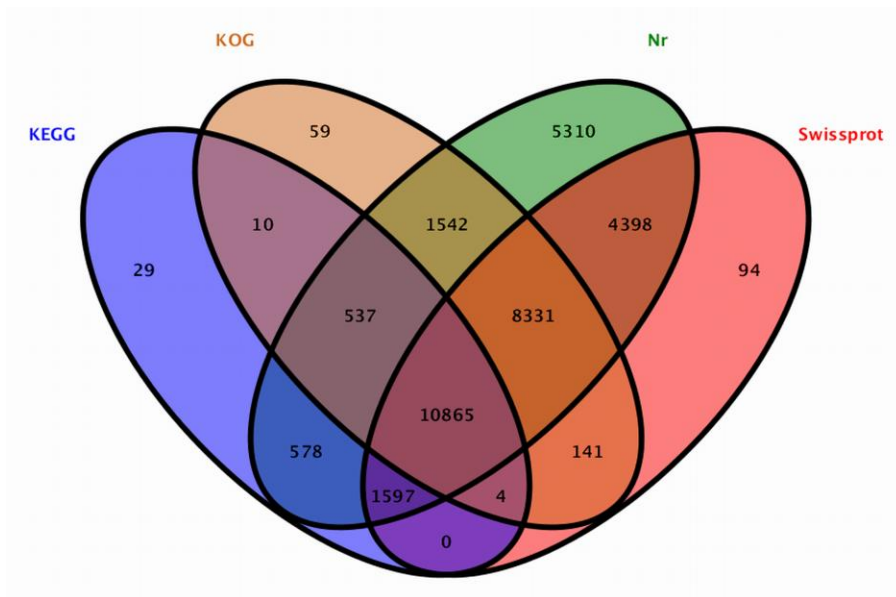

548

549

550 Fig. 3. Four database annotation of Venn diagrams.

551

552

553

554

555

556

557

558

559

560

561

562

563

564

565

566

567

568

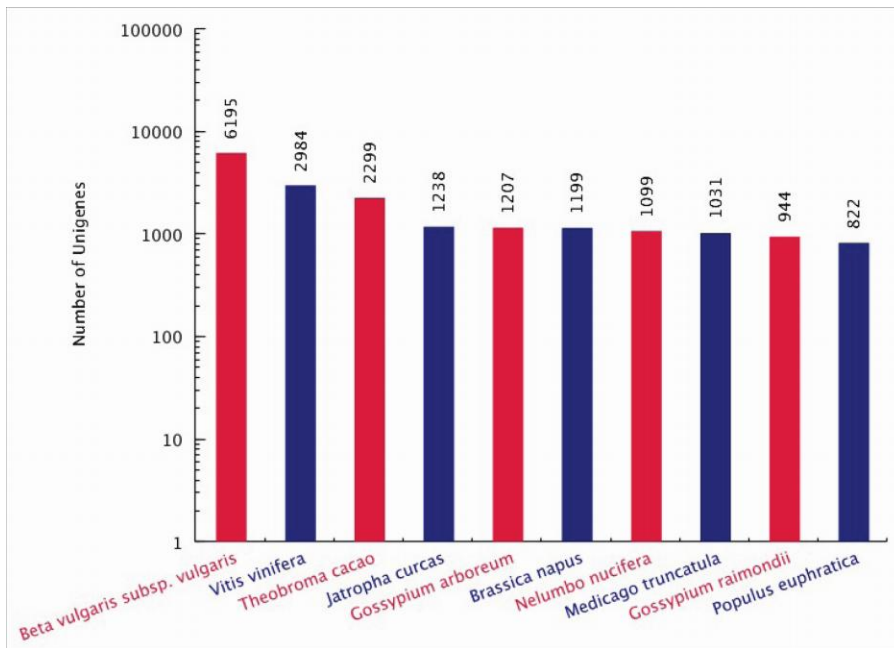

569

570

571 Fig. 4. Distribution statistics of near source varieties (Top 10).

572

573

574

575

576

577

578

579

580

581

582

583

584

585

586

587

588

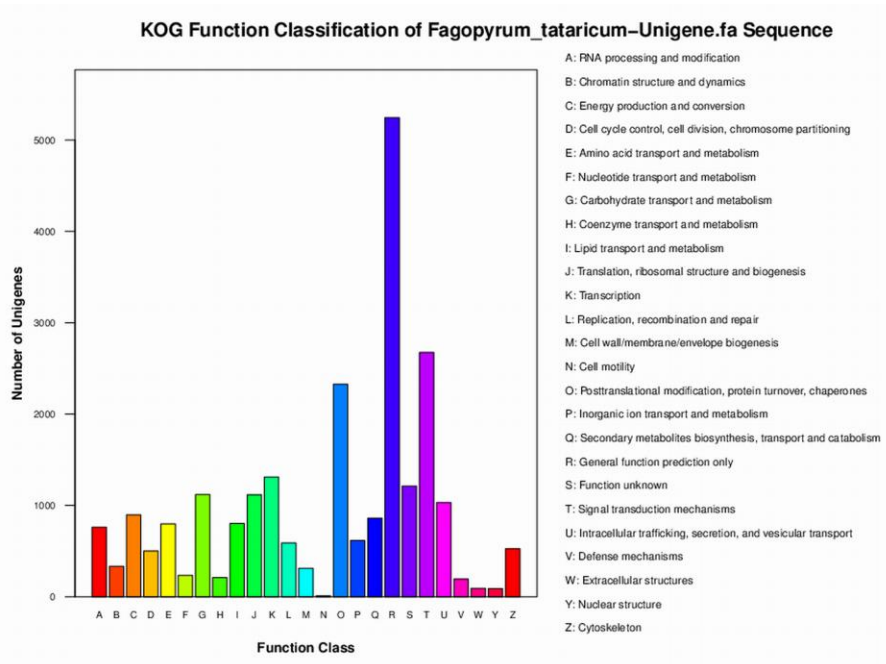

589

590

591 Fig. 5. KOG function classification of *Fagopyrum tataricum* unigenes (Note: 21,489 unigenes are  
592 annotated and classified into 25 KOG categories from the final set of 62,637 unigenes).

593

594

595

596

597

598

599

600

601

602

603

604

605

606

607

608

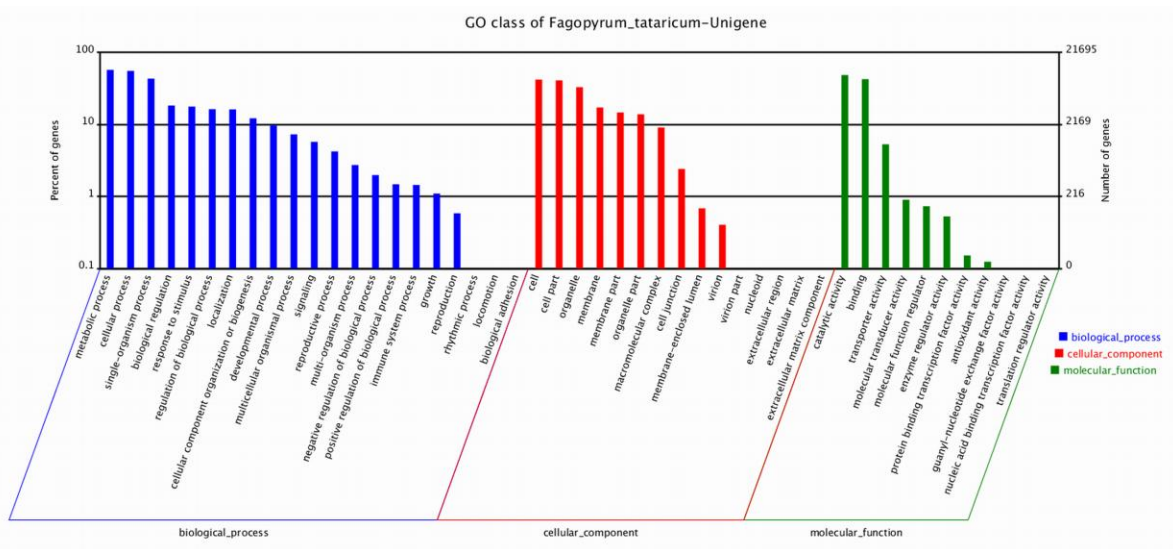

609

610

611 Fig. 6. GO classification of unigenes in *Fagopyrum tataricum*.

612

613

614

615

616

617

618

619

620

621

622

623

624

625

626

627

628

629

630

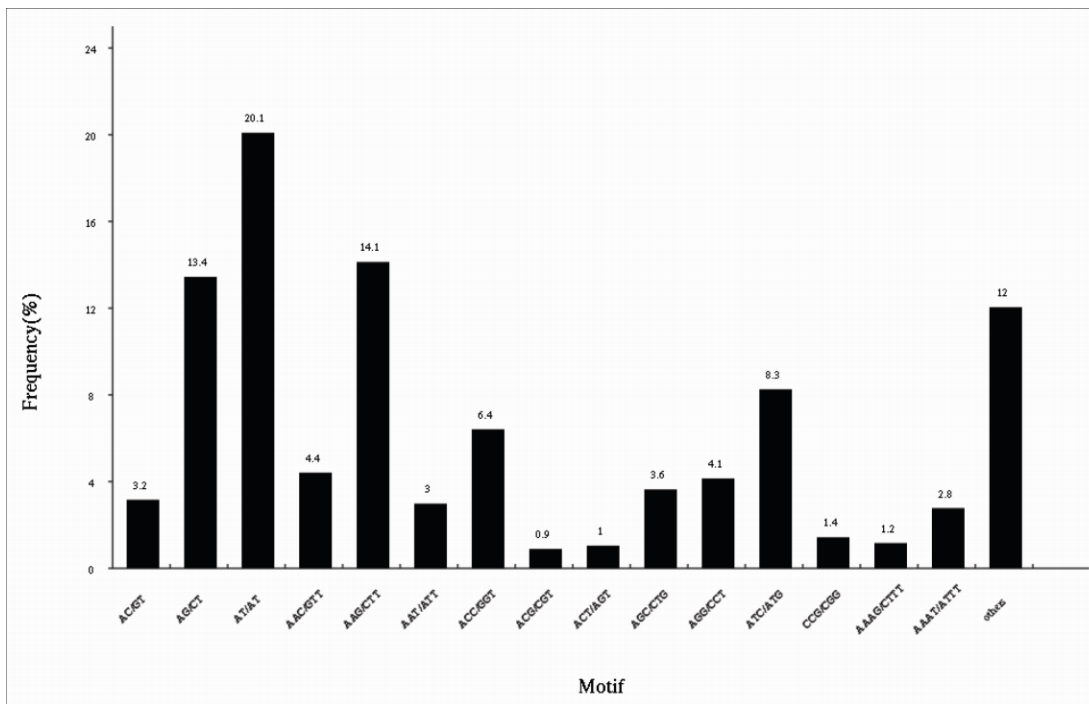

631

632

633 Fig. 7. Distribution of SSR motifs in *Fagopyrum tataricum*.

634

635

636

637

638

639

640

641

642

643

644

645

646

647

648

649



650

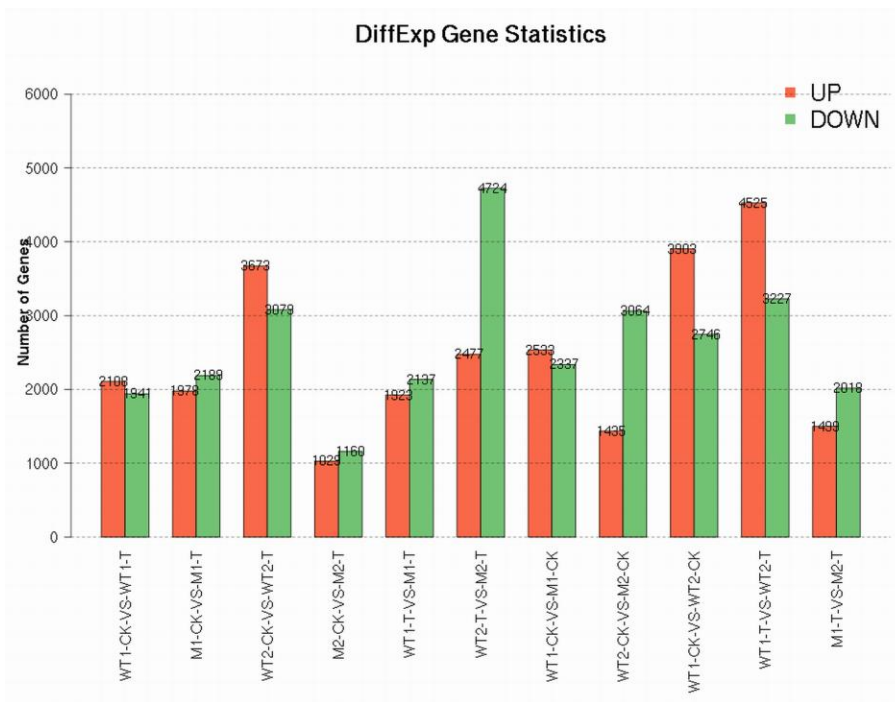

651

652

653 Fig. 8. Different expression of genes among samples.

654

655

656

657

658

659

660

661

662

663

664

665

666

667

668

669

670

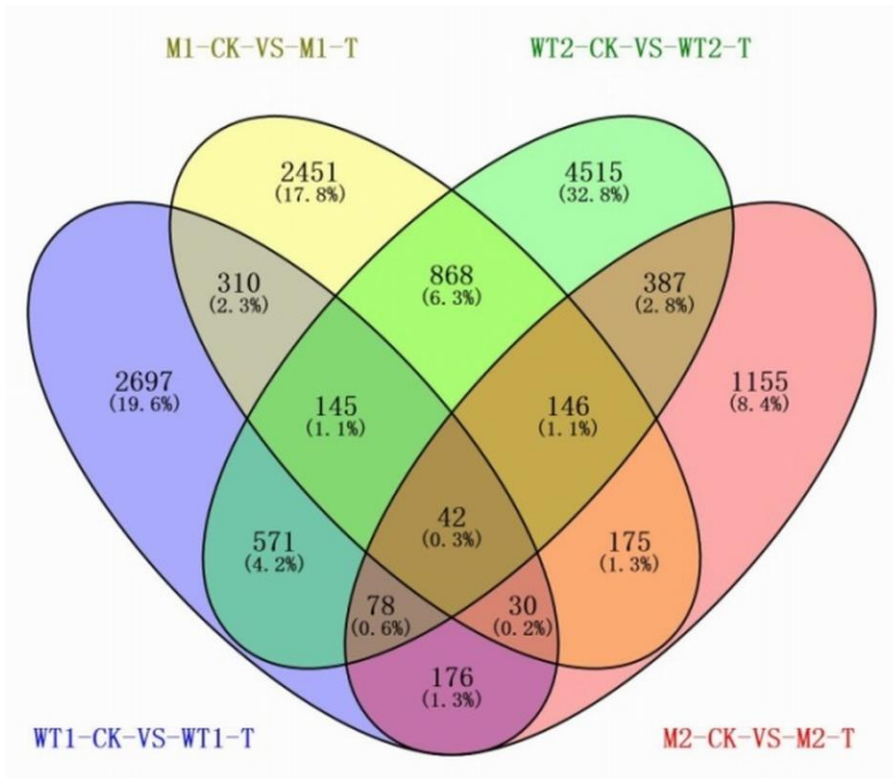

671

672

673 Fig. 9. DEGs among four groups of Venn diagrams.

674

675

676

677

678

679

680

681

682

683

684

685

686

687

688

689

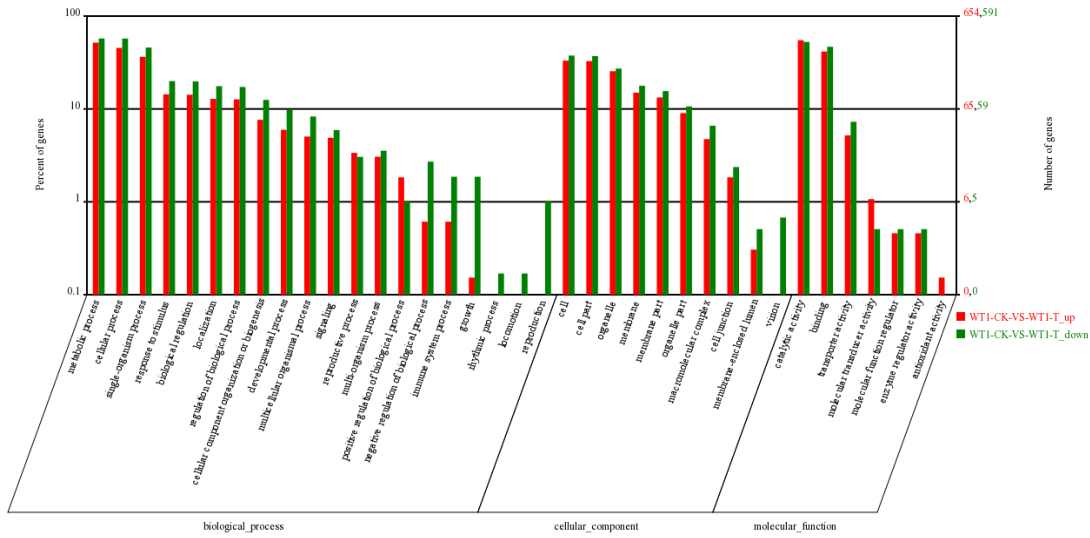

690

691 Fig. 10A. GO classification of DEGs between WT1-CK and WT1-T.

692

693

694

695

696

697

698

699

700

701

702

703

704

705

706

707

708

709

710

711

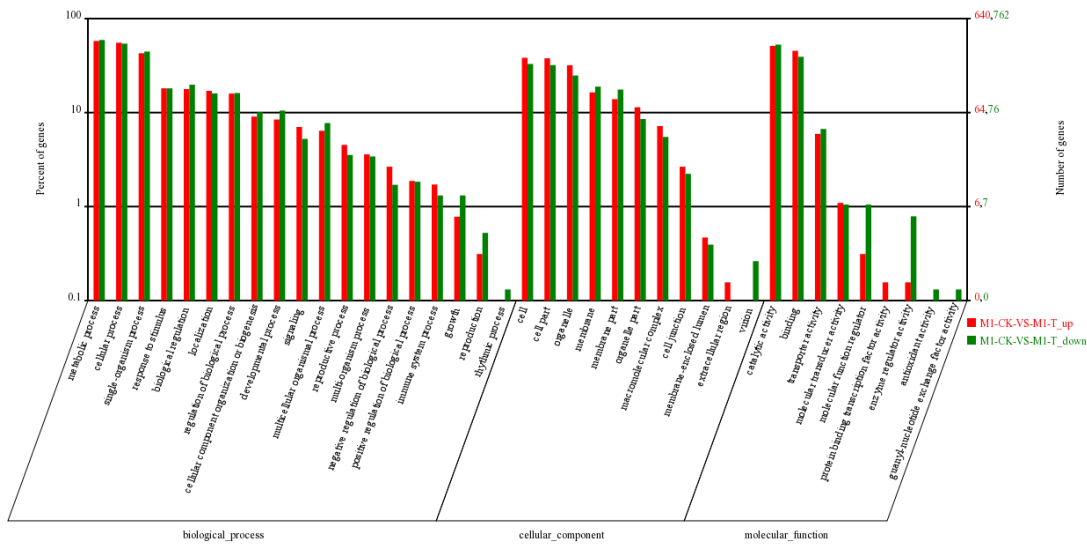

712

713 Fig. 10B. GO classification of DEGs between M1-CK and M1-T.

714

715

716

717

718

719

720

721

722

723

724

725

726

727

728

729

730

731

732

733

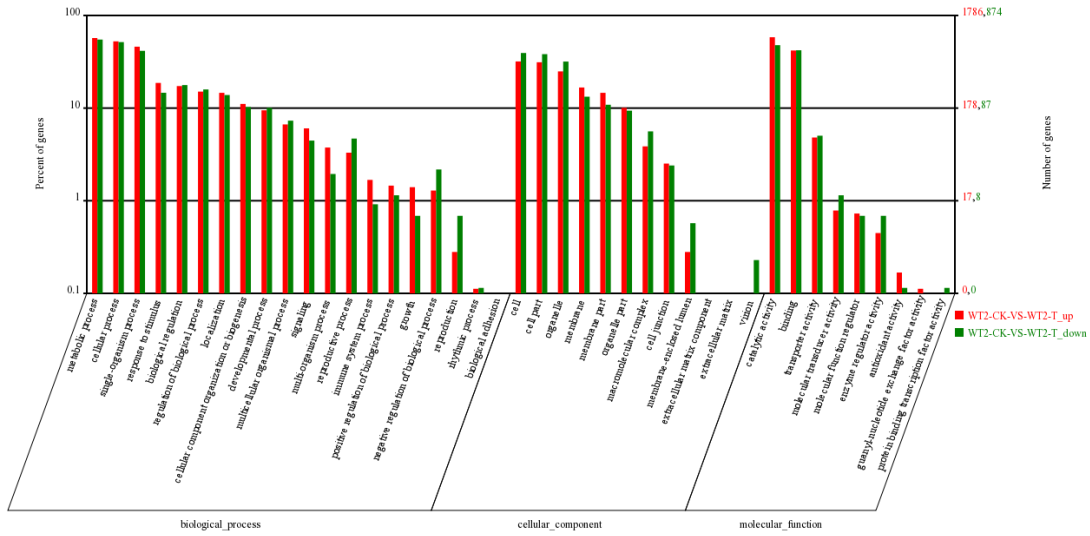

734

735 Fig. 10C. GO classification of DEGs between WT2-CK and WT2-T.

736

737

738

739

740

741

742

743

744

745

746

747

748

749

750

751

752

753

754

755

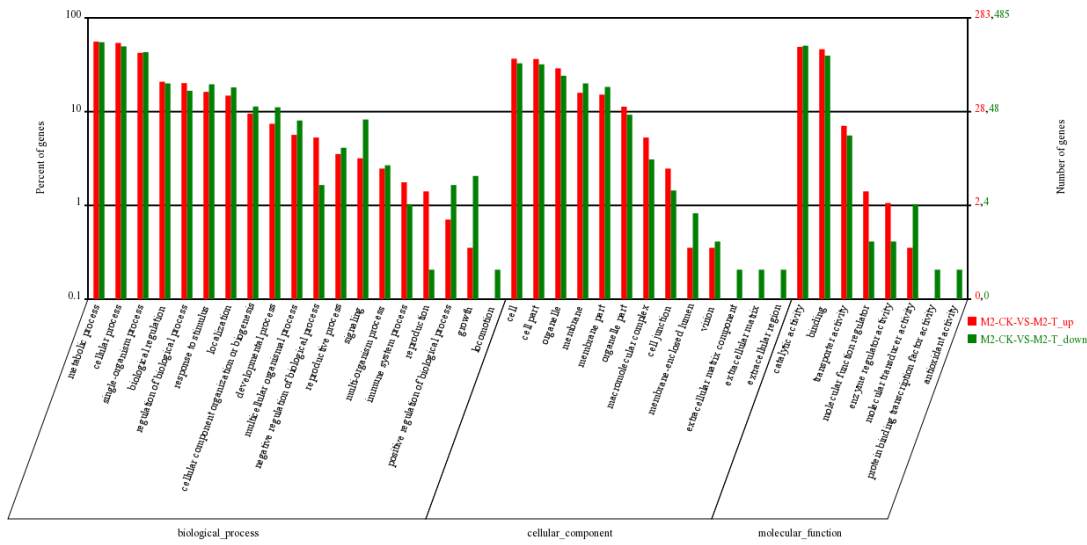

756

757 Fig. 10D. GO classification of DEGs between M2-CK and M2-T.

758

759

760

761

762

763

764

765

766

767

768

769

770

771

772

773

774

775

776

777

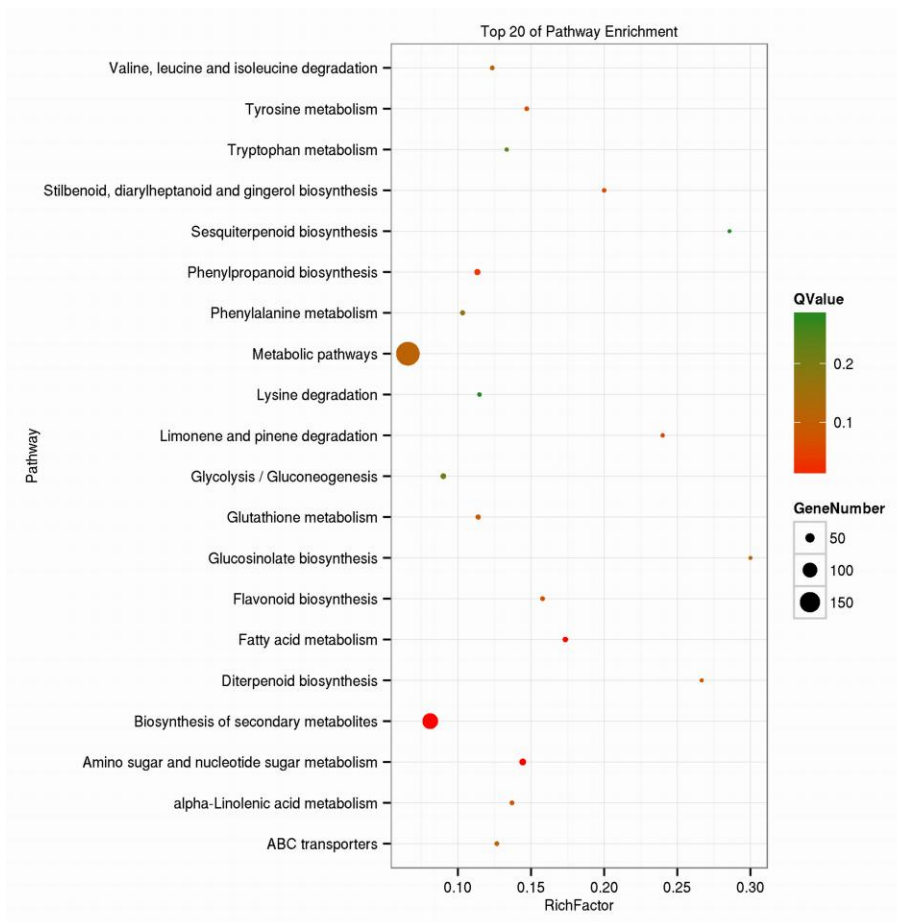

778

779

780 Fig. 11A. KEGG classification of DEGs between WT1-CK and WT1-T.

781

782

783

784

785

786

787

788

789

790

791

792

793

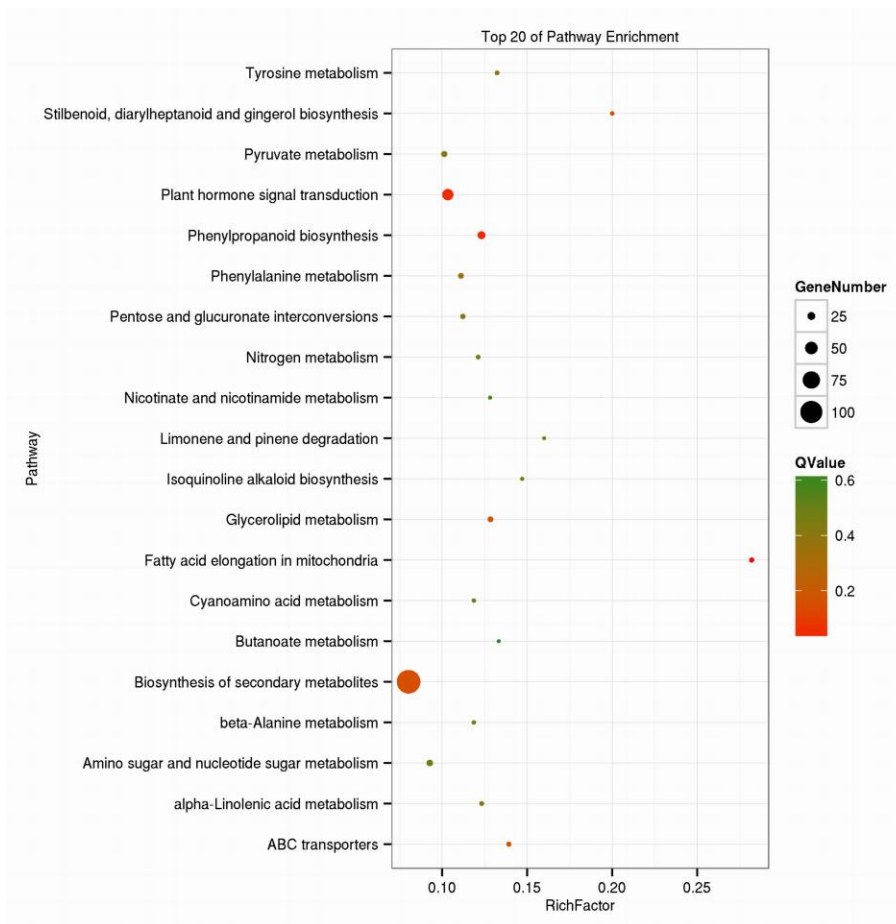

794

795

796 Fig. 11B. KEGG classification of DEGs between M1-CK and M1-T.

797

798

799

800

801

802

803

804

805

806

807

808



809

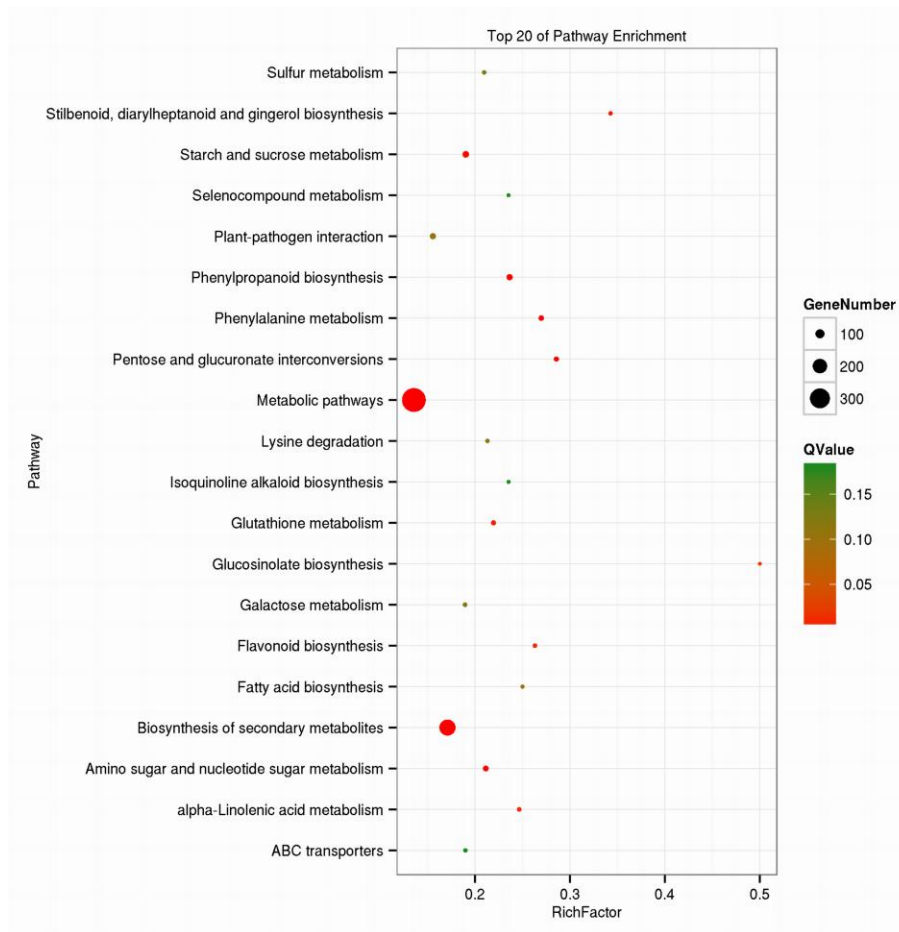

810

811

812 Fig. 11C. KEGG classification of DEGs between WT2-CK and WT2-T.

813

814

815

816

817

818

819

820

821

822

823

824

825

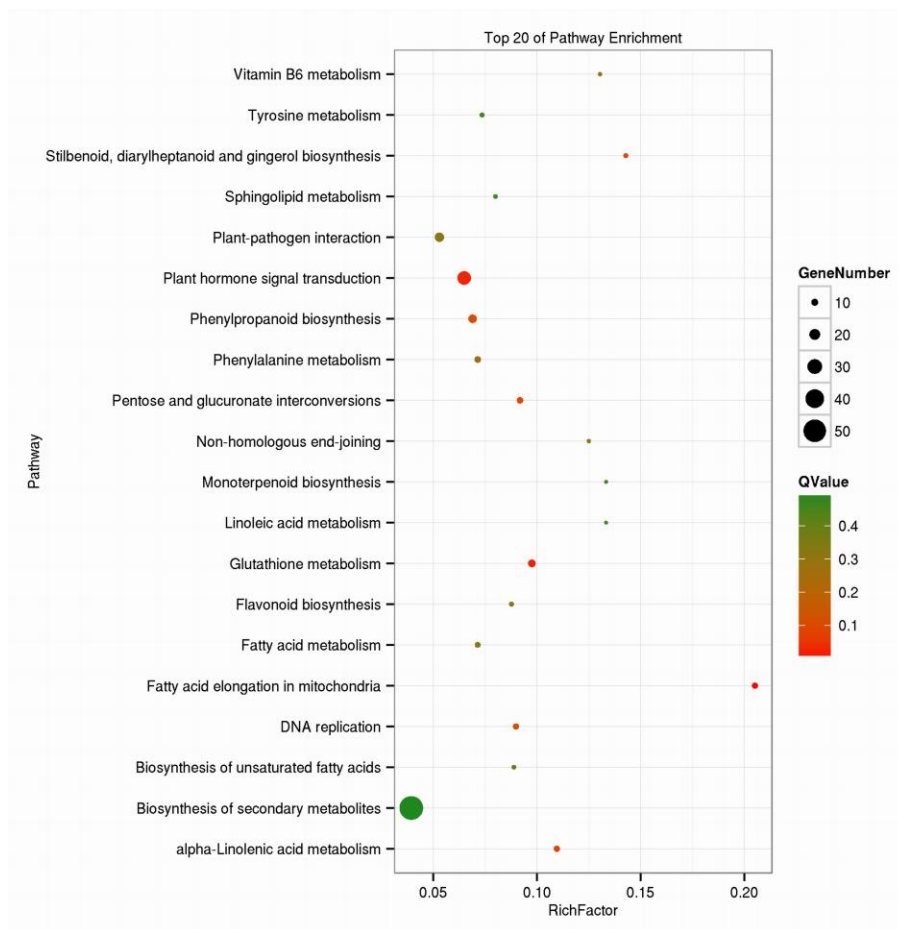

826

827

828 Fig. 11D. KEGG classification of DEGs between M2-CK and M2-T.

829

830

831

832

833

834

835

836

837

838

839

840

841

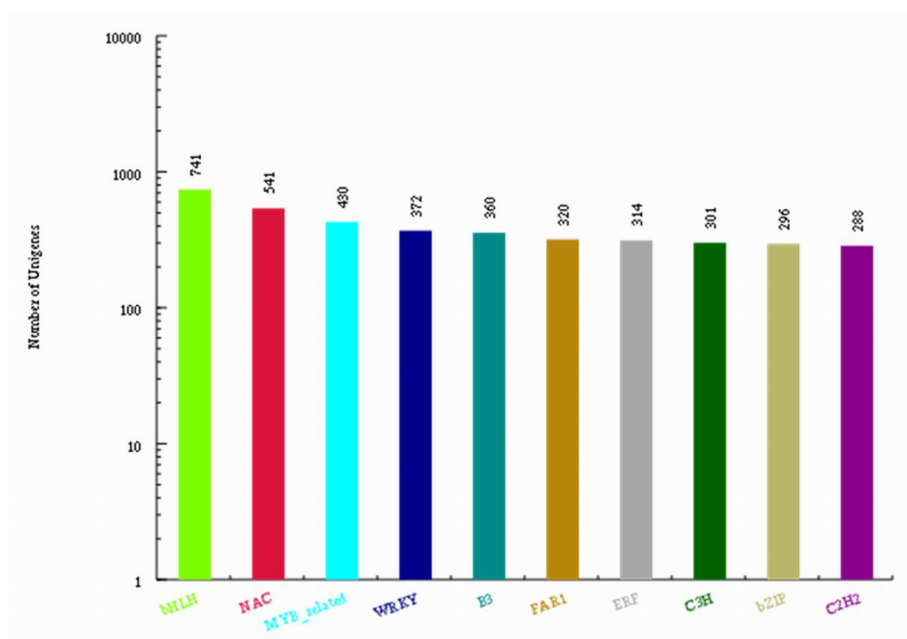

842

843

844 Fig. 12. The top 10 numbers of TF classification statistics.

Table 1. Characteristics of unigenes.

| Item                  | Number   |
|-----------------------|----------|
| Genes Num             | 62637    |
| GC percentage         | 41.20%   |
| N50                   | 1596     |
| Max length            | 16598    |
| Min length            | 201      |
| Average length        | 906.62   |
| Total assembled bases | 56788193 |

Table 2. Major Characteristics of *de novo* assembled data in 8 samples.

| Sample | Before Filter Reads<br>Num | After Filter Reads<br>Num ( % ) | Before Filter<br>Data(bp) | After Filter<br>Data(bp) | GC<br>content<br>(%) | Q20 ( % ) | Q30 ( % ) |
|--------|----------------------------|---------------------------------|---------------------------|--------------------------|----------------------|-----------|-----------|
| WT1-CK | 31341726                   | 30797606(98.26%)                | 3917715750                | 3849700750               | 46.60%               | 97.95%    | 94.68%    |
| WT1-T  | 26652830                   | 26065952(97.8%)                 | 3331603750                | 3258244000               | 46.83%               | 97.89%    | 94.57%    |
| M1-CK  | 25401950                   | 24813440(97.68%)                | 3175243750                | 3101680000               | 47.05%               | 97.96%    | 94.72%    |
| M1-T   | 21751536                   | 21182362(97.82%)                | 2718942000                | 2647795250               | 46.94%               | 97.96%    | 94.70%    |
| WT2-CK | 26733004                   | 26150598(97.82%)                | 3341625500                | 3268824750               | 46.99%               | 97.77%    | 94.27%    |
| WT2-T  | 27379842                   | 26838652(98.02%)                | 3422480250                | 3354831500               | 47.61%               | 97.87%    | 94.48%    |
| M2-CK  | 22927220                   | 22524706(98.24%)                | 2865902500                | 2815588250               | 47.22%               | 97.88%    | 94.52%    |
| M2-T   | 27330326                   | 26854340(98.26%)                | 3416290750                | 3356792500               | 47.20%               | 97.84%    | 94.40%    |

Notes: Q20 (%) and Q30 (%) are the percentages of reads with Phred scores over than 20 and 30, respectively. GC content (%) means G+C bases as the percentage of total bases; WT1-CK, M1-CK, WT2-CK, M2-CK and WT1-T, M1-T, WT2-T, M2-T represent control and salt-treated samples respectively.

Table 3. Type statistics of SSRs.

| Stat Item                                      | Num      |
|------------------------------------------------|----------|
| Total number of sequences examined             | 62637    |
| Total size of examined sequences (bp)          | 56788193 |
| Total number of identified SSRs                | 3355     |
| Number of SSR containing sequences             | 3025     |
| Number of sequences containing more than 1 SSR | 289      |
| Number of SSRs present in compound formation   | 121      |
| Di-nucleotide                                  | 1234     |
| Tri-nucleotide                                 | 1588     |
| Tetra-nucleotide                               | 294      |
| Penta-nucleotide                               | 95       |
| Hexa-nucleotide                                | 144      |

Table 4. RT-qPCR primer names and primer sequences.

| Primer Name     | Primer Sequences (5'-3')  |
|-----------------|---------------------------|
| <i>Actin</i> -F | GCTGGATTTGCTGGAGATGATGC   |
| <i>Actin</i> -R | CTTCTCCATGTCATCCCAGTTGCT  |
| 23096-F         | GTGGAAGAAGGAGAAAACAAATTCA |
| 23096-R         | GAATCTTTCCCGTCTCCGGC      |
| 17446-F         | CGAAAGGAAACTCTGGAGGACA    |
| 17446-R         | CTTGTGTTGCTGATGTTGGGA     |
| 11757-F         | GGCCCAAAGTGCATCGGA        |
| 11757-R         | GAGGTCAGACATGATTGCTCCA    |
| 57231-F         | AAAGGGATGAAGTGAGCTAGGAAA  |
| 57231-R         | GATCTCTCCCTTGACCGGCT      |
| 29688-F         | GCTTCTTTGAGCTTTGCTGT      |
| 29688-R         | TCTGTTGGGGAACACCGAGA      |
| 60321-F         | GCCGTTGATCTTGTCTGGGT      |
| 60321-R         | CCAACCTTTGGGTCCGGTTTG     |
| 9545-F          | CAGAAGAGCCAGAACTCGGAA     |
| 9545-R          | CCCAATTAGGTCTGCTTCTGC     |
| 36375-F         | CGTTGCTAGGACGCAATGTTCCA   |
| 36375-R         | ACAGTCCACGTCGGATGCCTTAT   |
| 38654-F         | CCTTACACCGTAGCTTTGCTC     |
| 38654-R         | CCGGAAGAAACACAGCCAACA     |

Length distribution of *Fagopyrum\_tataricum*-Unigene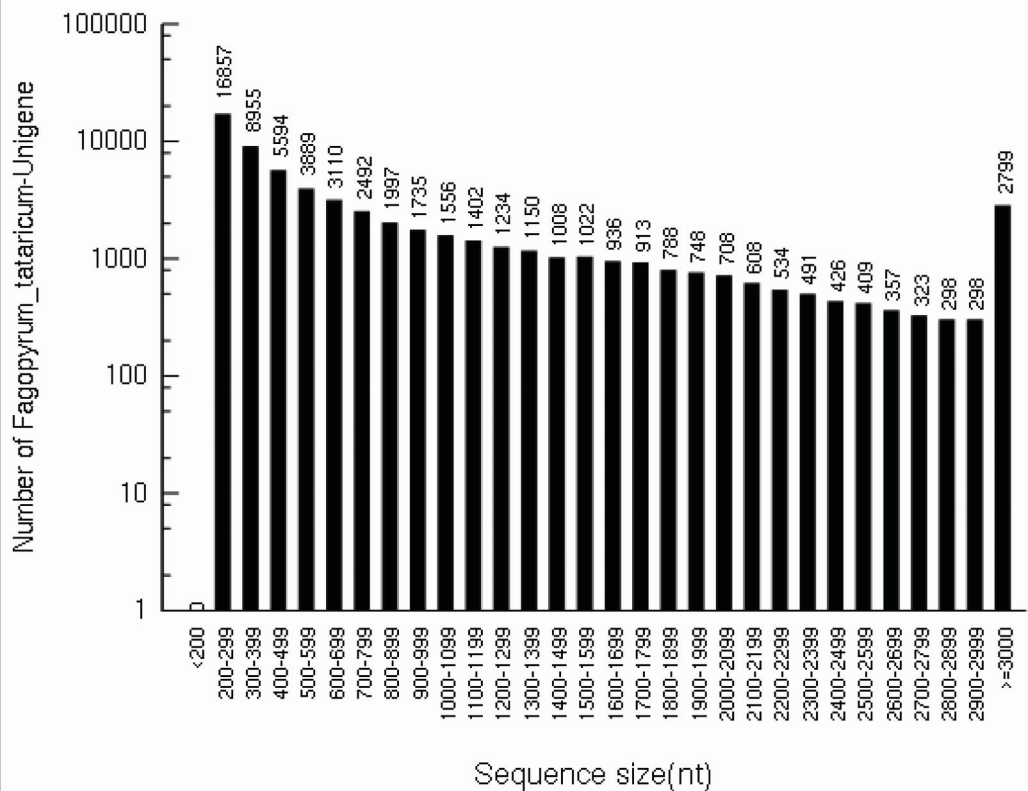



Number of Unigenes

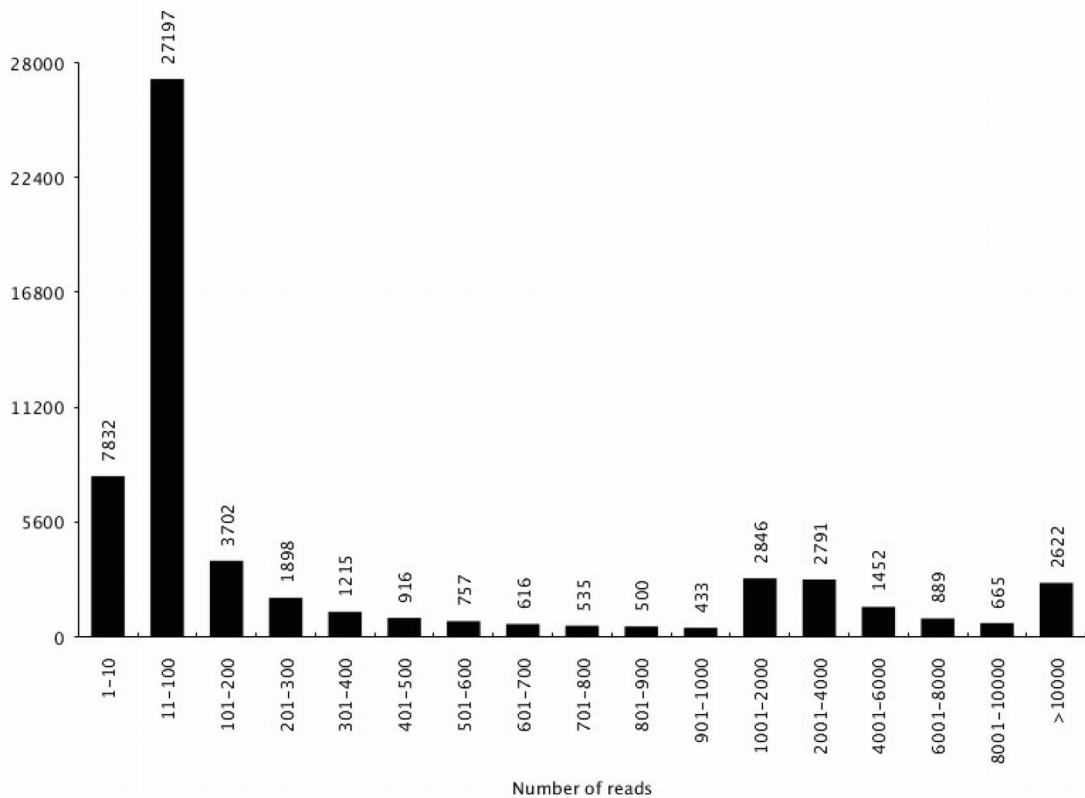

KOG

Nr

KEGG

Swissprot

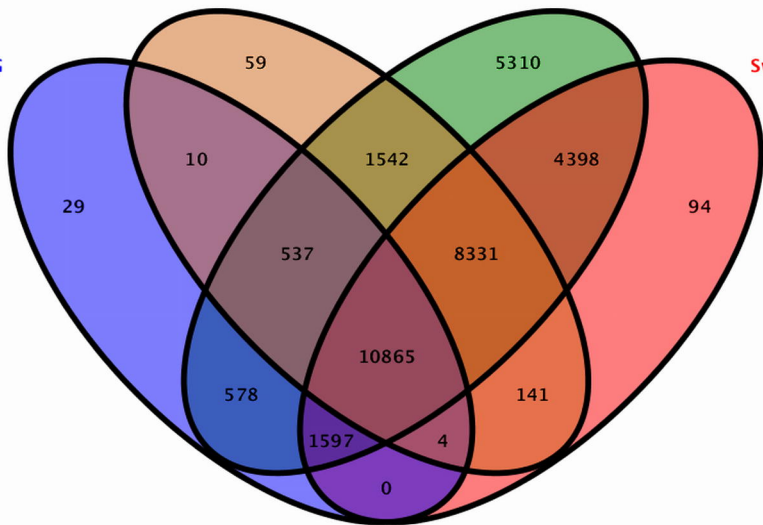

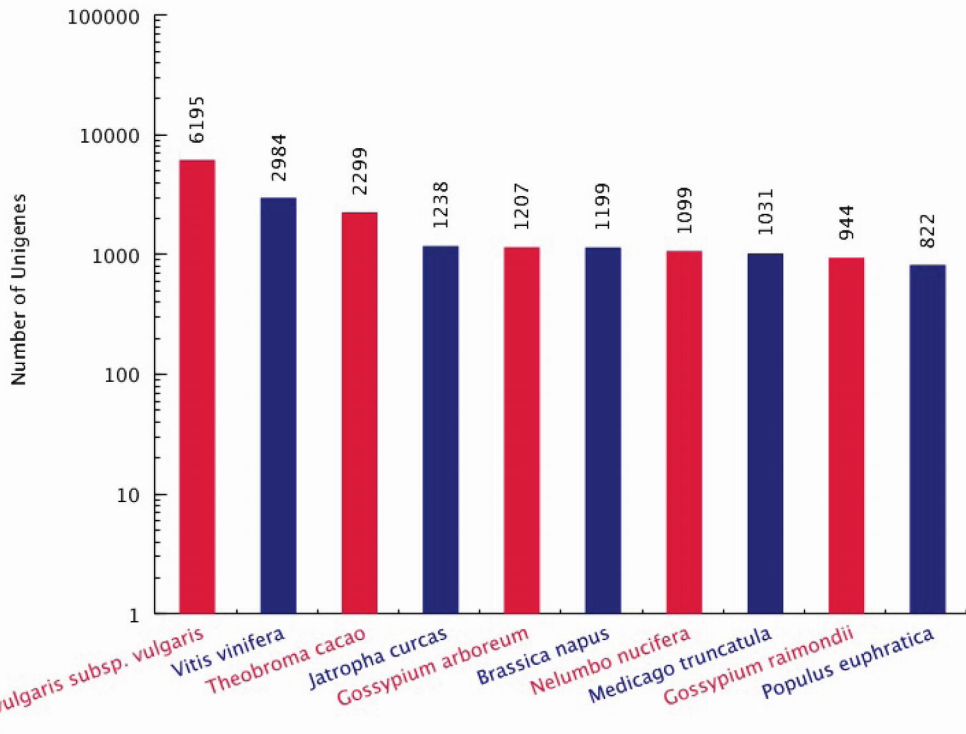

# KOG Function Classification of *Fagopyrum\_tataricum*-Unigene.fa Sequence

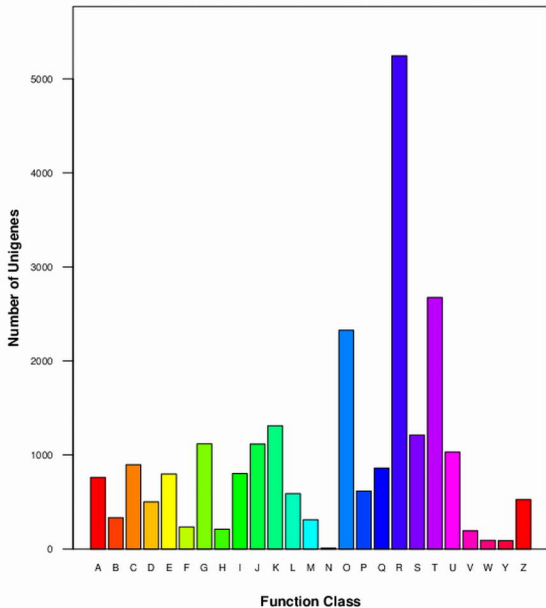

- A: RNA processing and modification
- B: Chromatin structure and dynamics
- C: Energy production and conversion
- D: Cell cycle control, cell division, chromosome partitioning
- E: Amino acid transport and metabolism
- F: Nucleotide transport and metabolism
- G: Carbohydrate transport and metabolism
- H: Coenzyme transport and metabolism
- I: Lipid transport and metabolism
- J: Translation, ribosomal structure and biogenesis
- K: Transcription
- L: Replication, recombination and repair
- M: Cell wall/membrane/envelope biogenesis
- N: Cell motility
- O: Posttranslational modification, protein turnover, chaperones
- P: Inorganic ion transport and metabolism
- Q: Secondary metabolites biosynthesis, transport and catabolism
- R: General function prediction only
- S: Function unknown
- T: Signal transduction mechanisms
- U: Intracellular trafficking, secretion, and vesicular transport
- V: Defense mechanisms
- W: Extracellular structures
- Y: Nuclear structure
- Z: Cytoskeleton

# GO class of Fagopyrum\_tataricum-Unigene

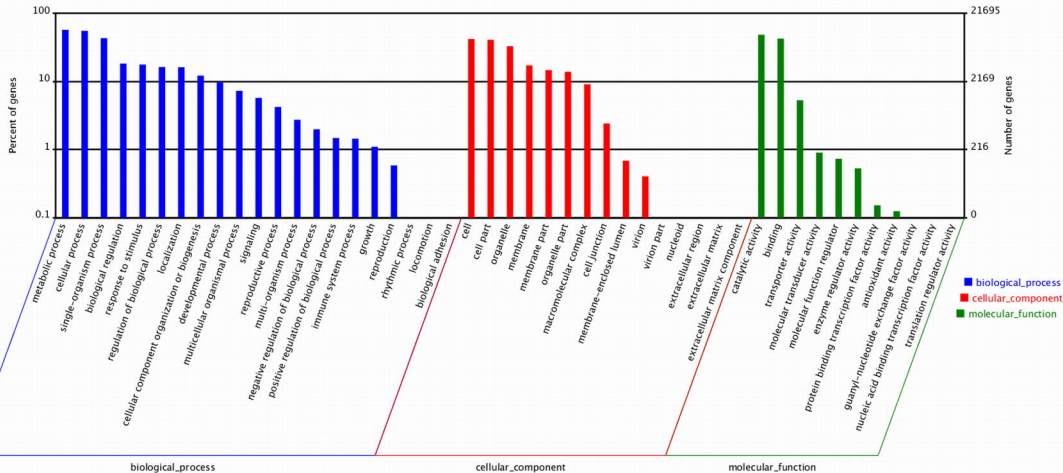

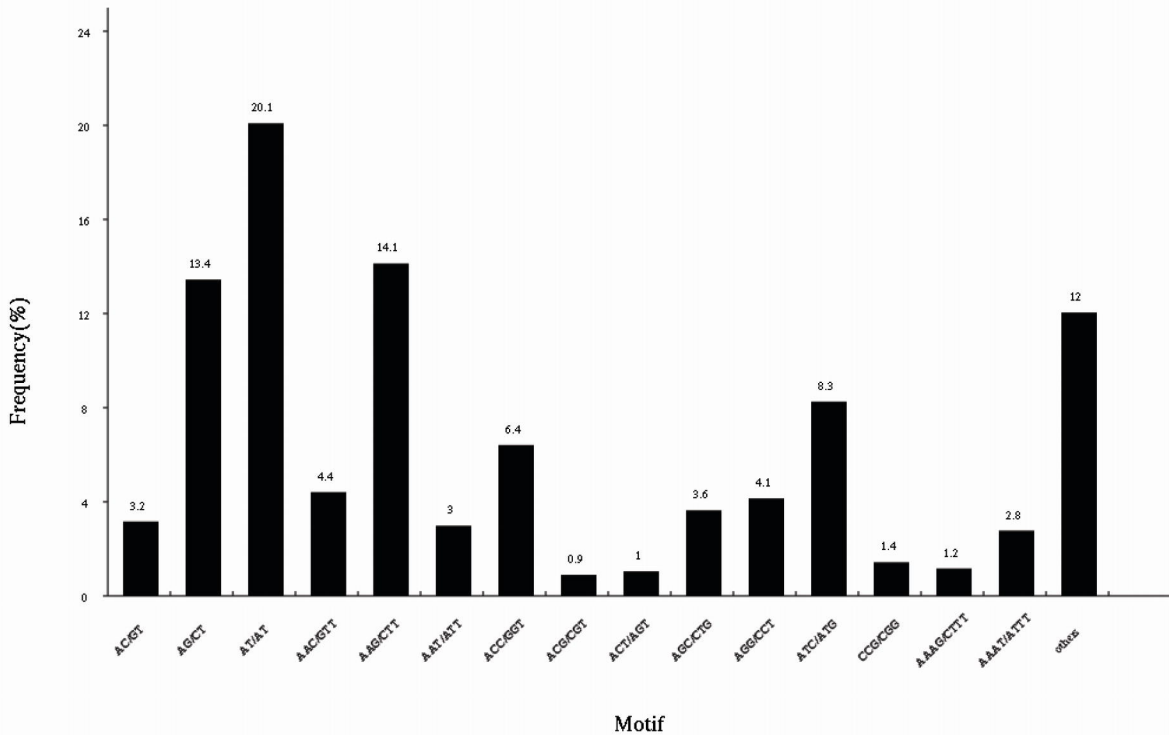

# DiffExp Gene Statistics

UP  
DOWN

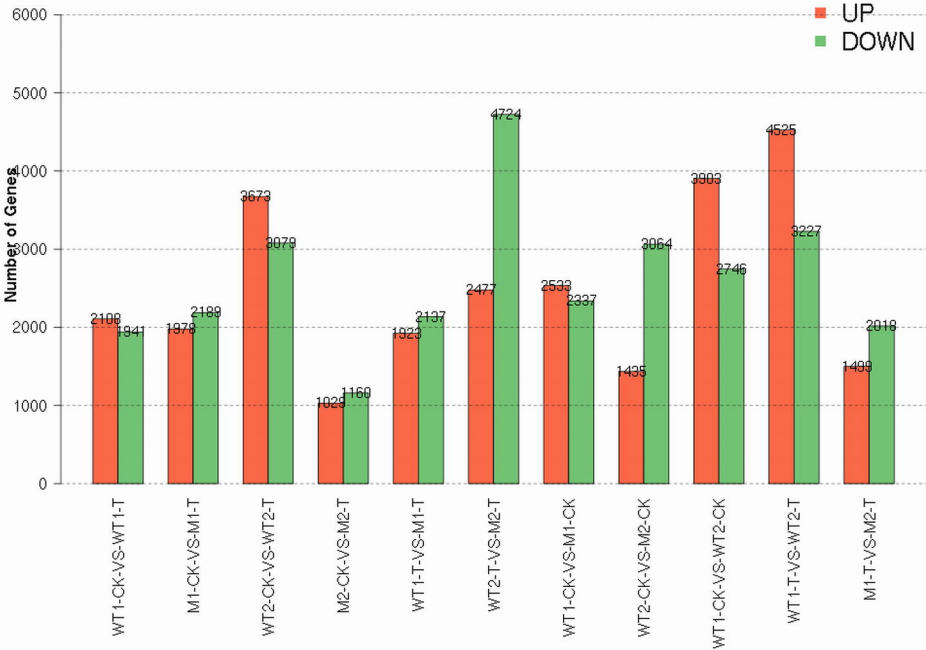

M1-CK-VS-M1-T

WT2-CK-VS-WT2-T

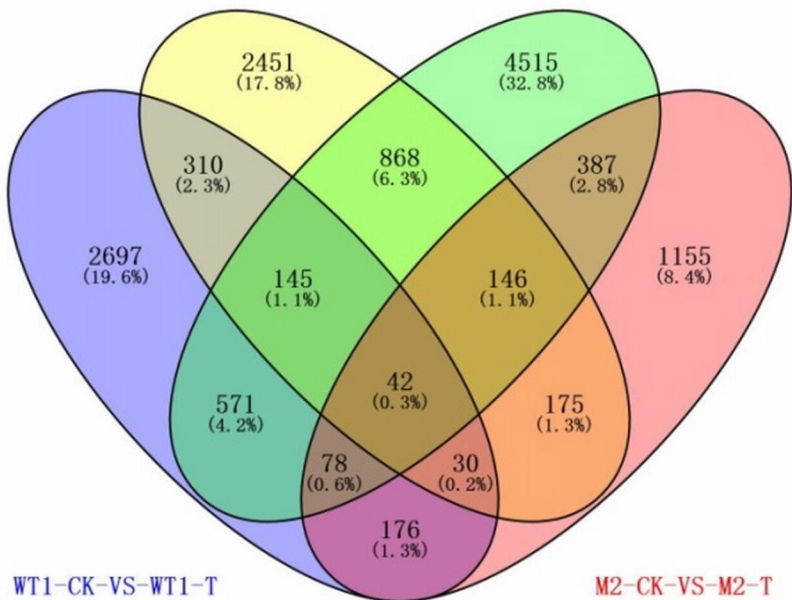



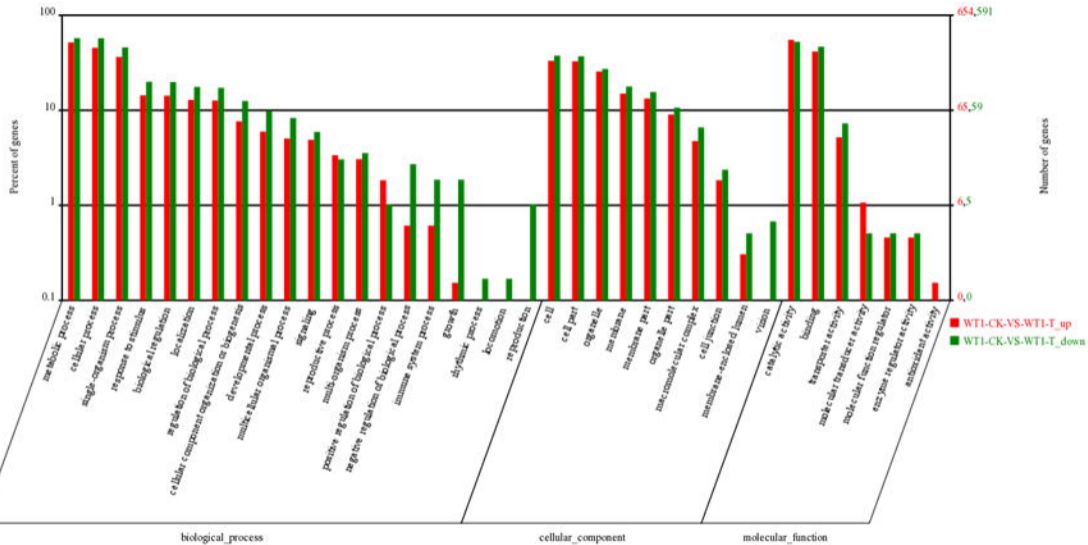

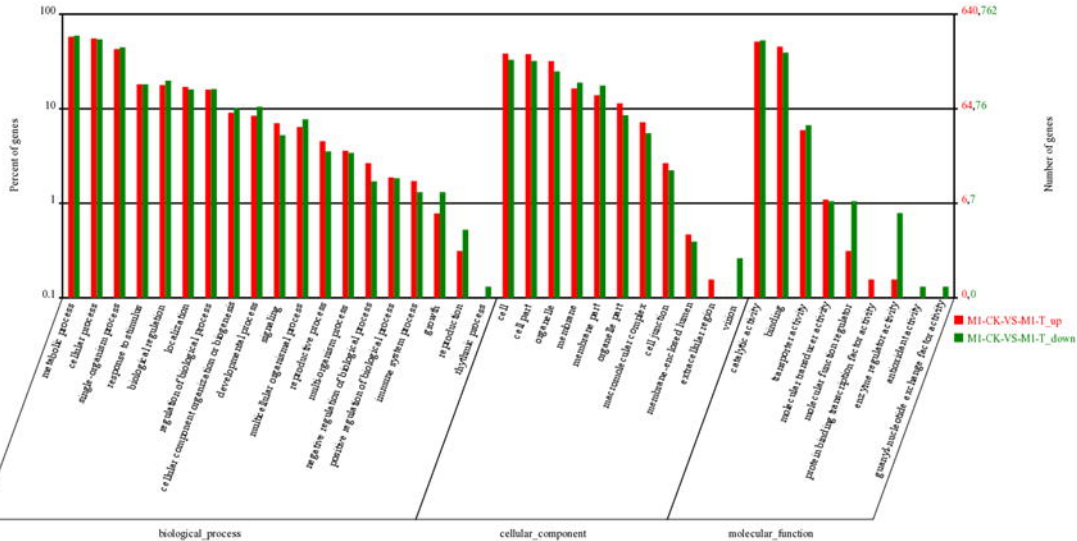

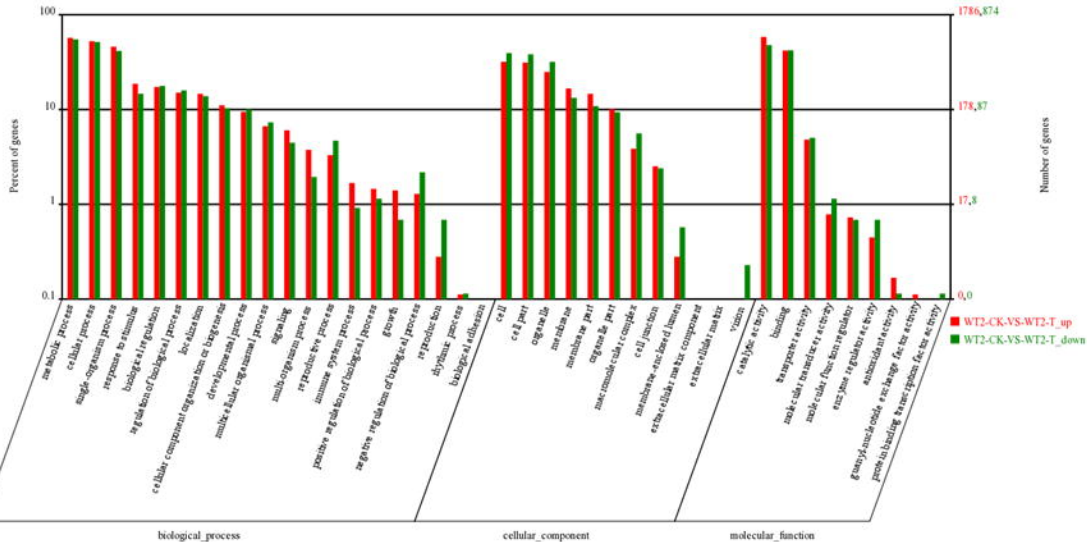

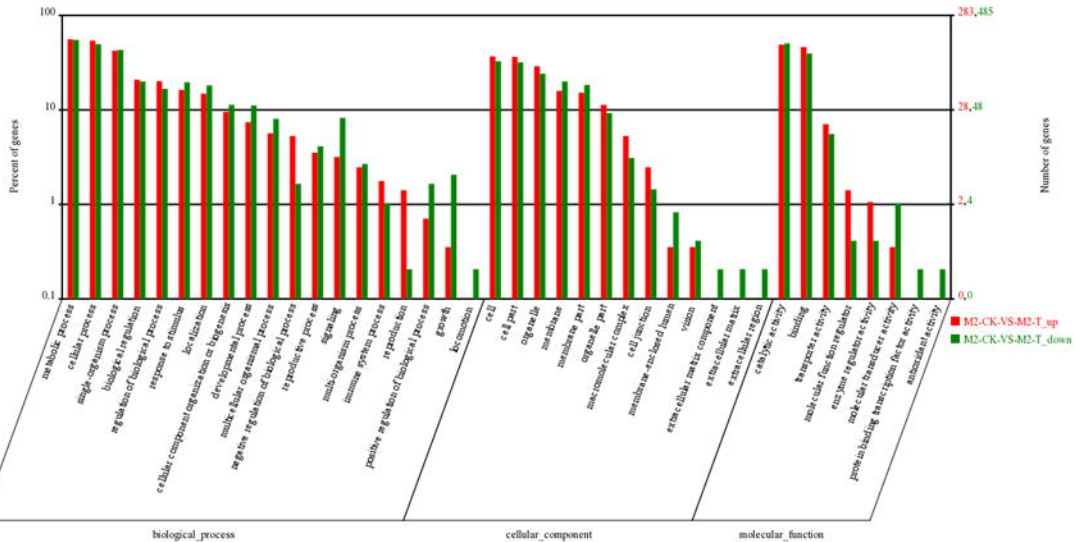

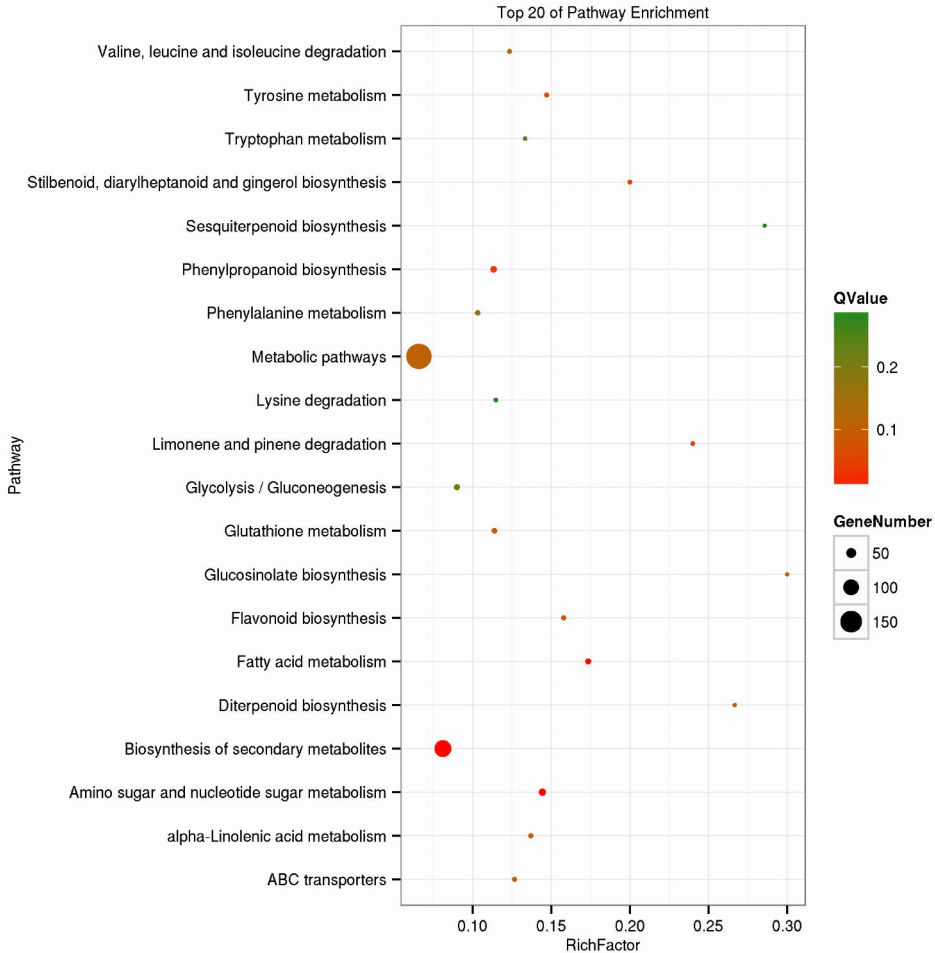

Top 20 of Pathway Enrichment

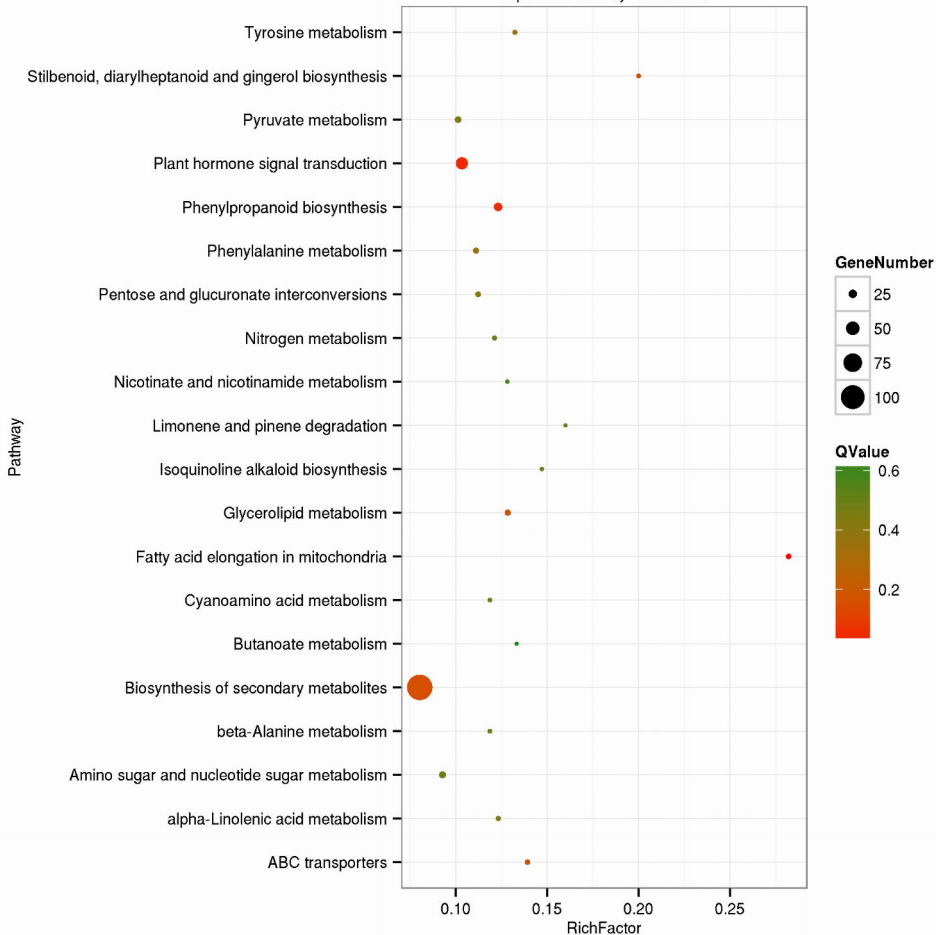

Top 20 of Pathway Enrichment

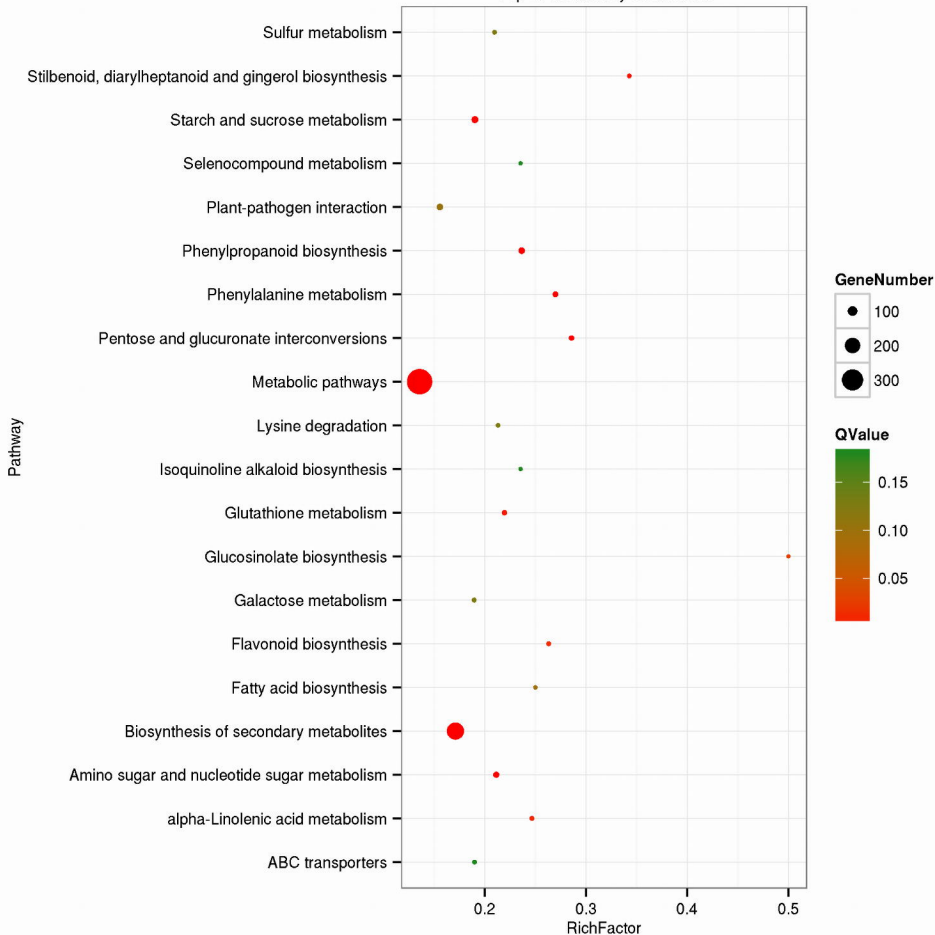

Top 20 of Pathway Enrichment

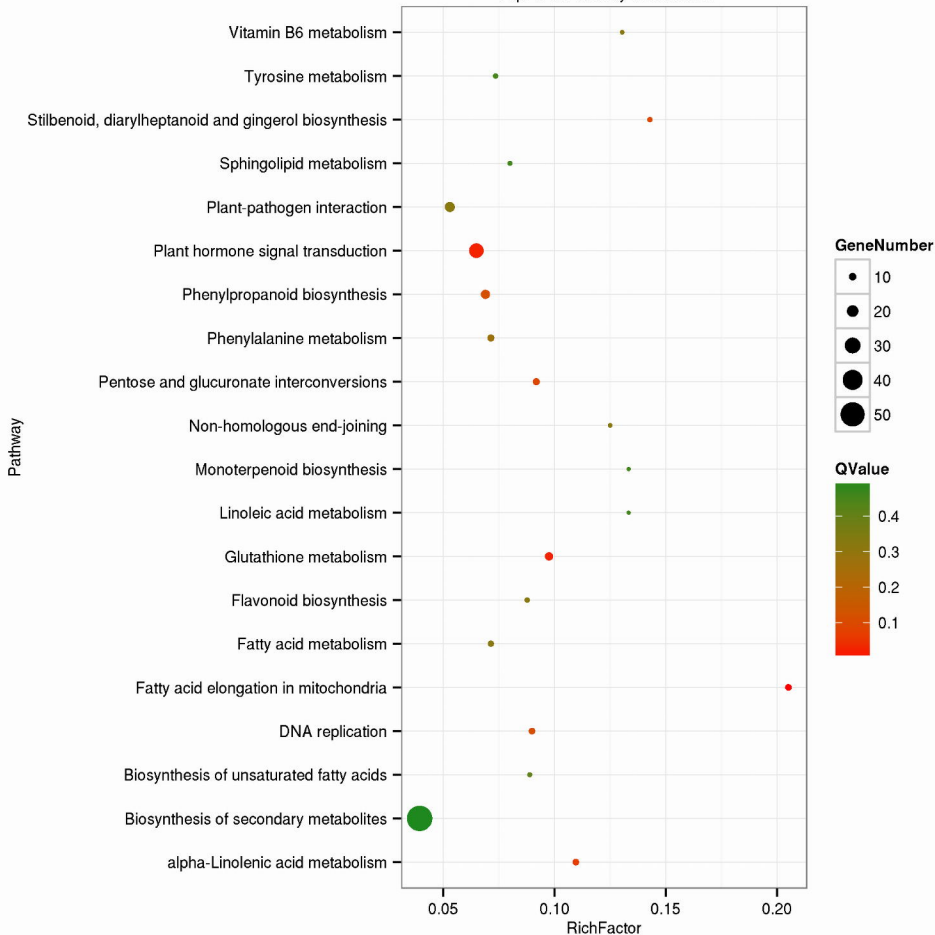



Number of Unigenes

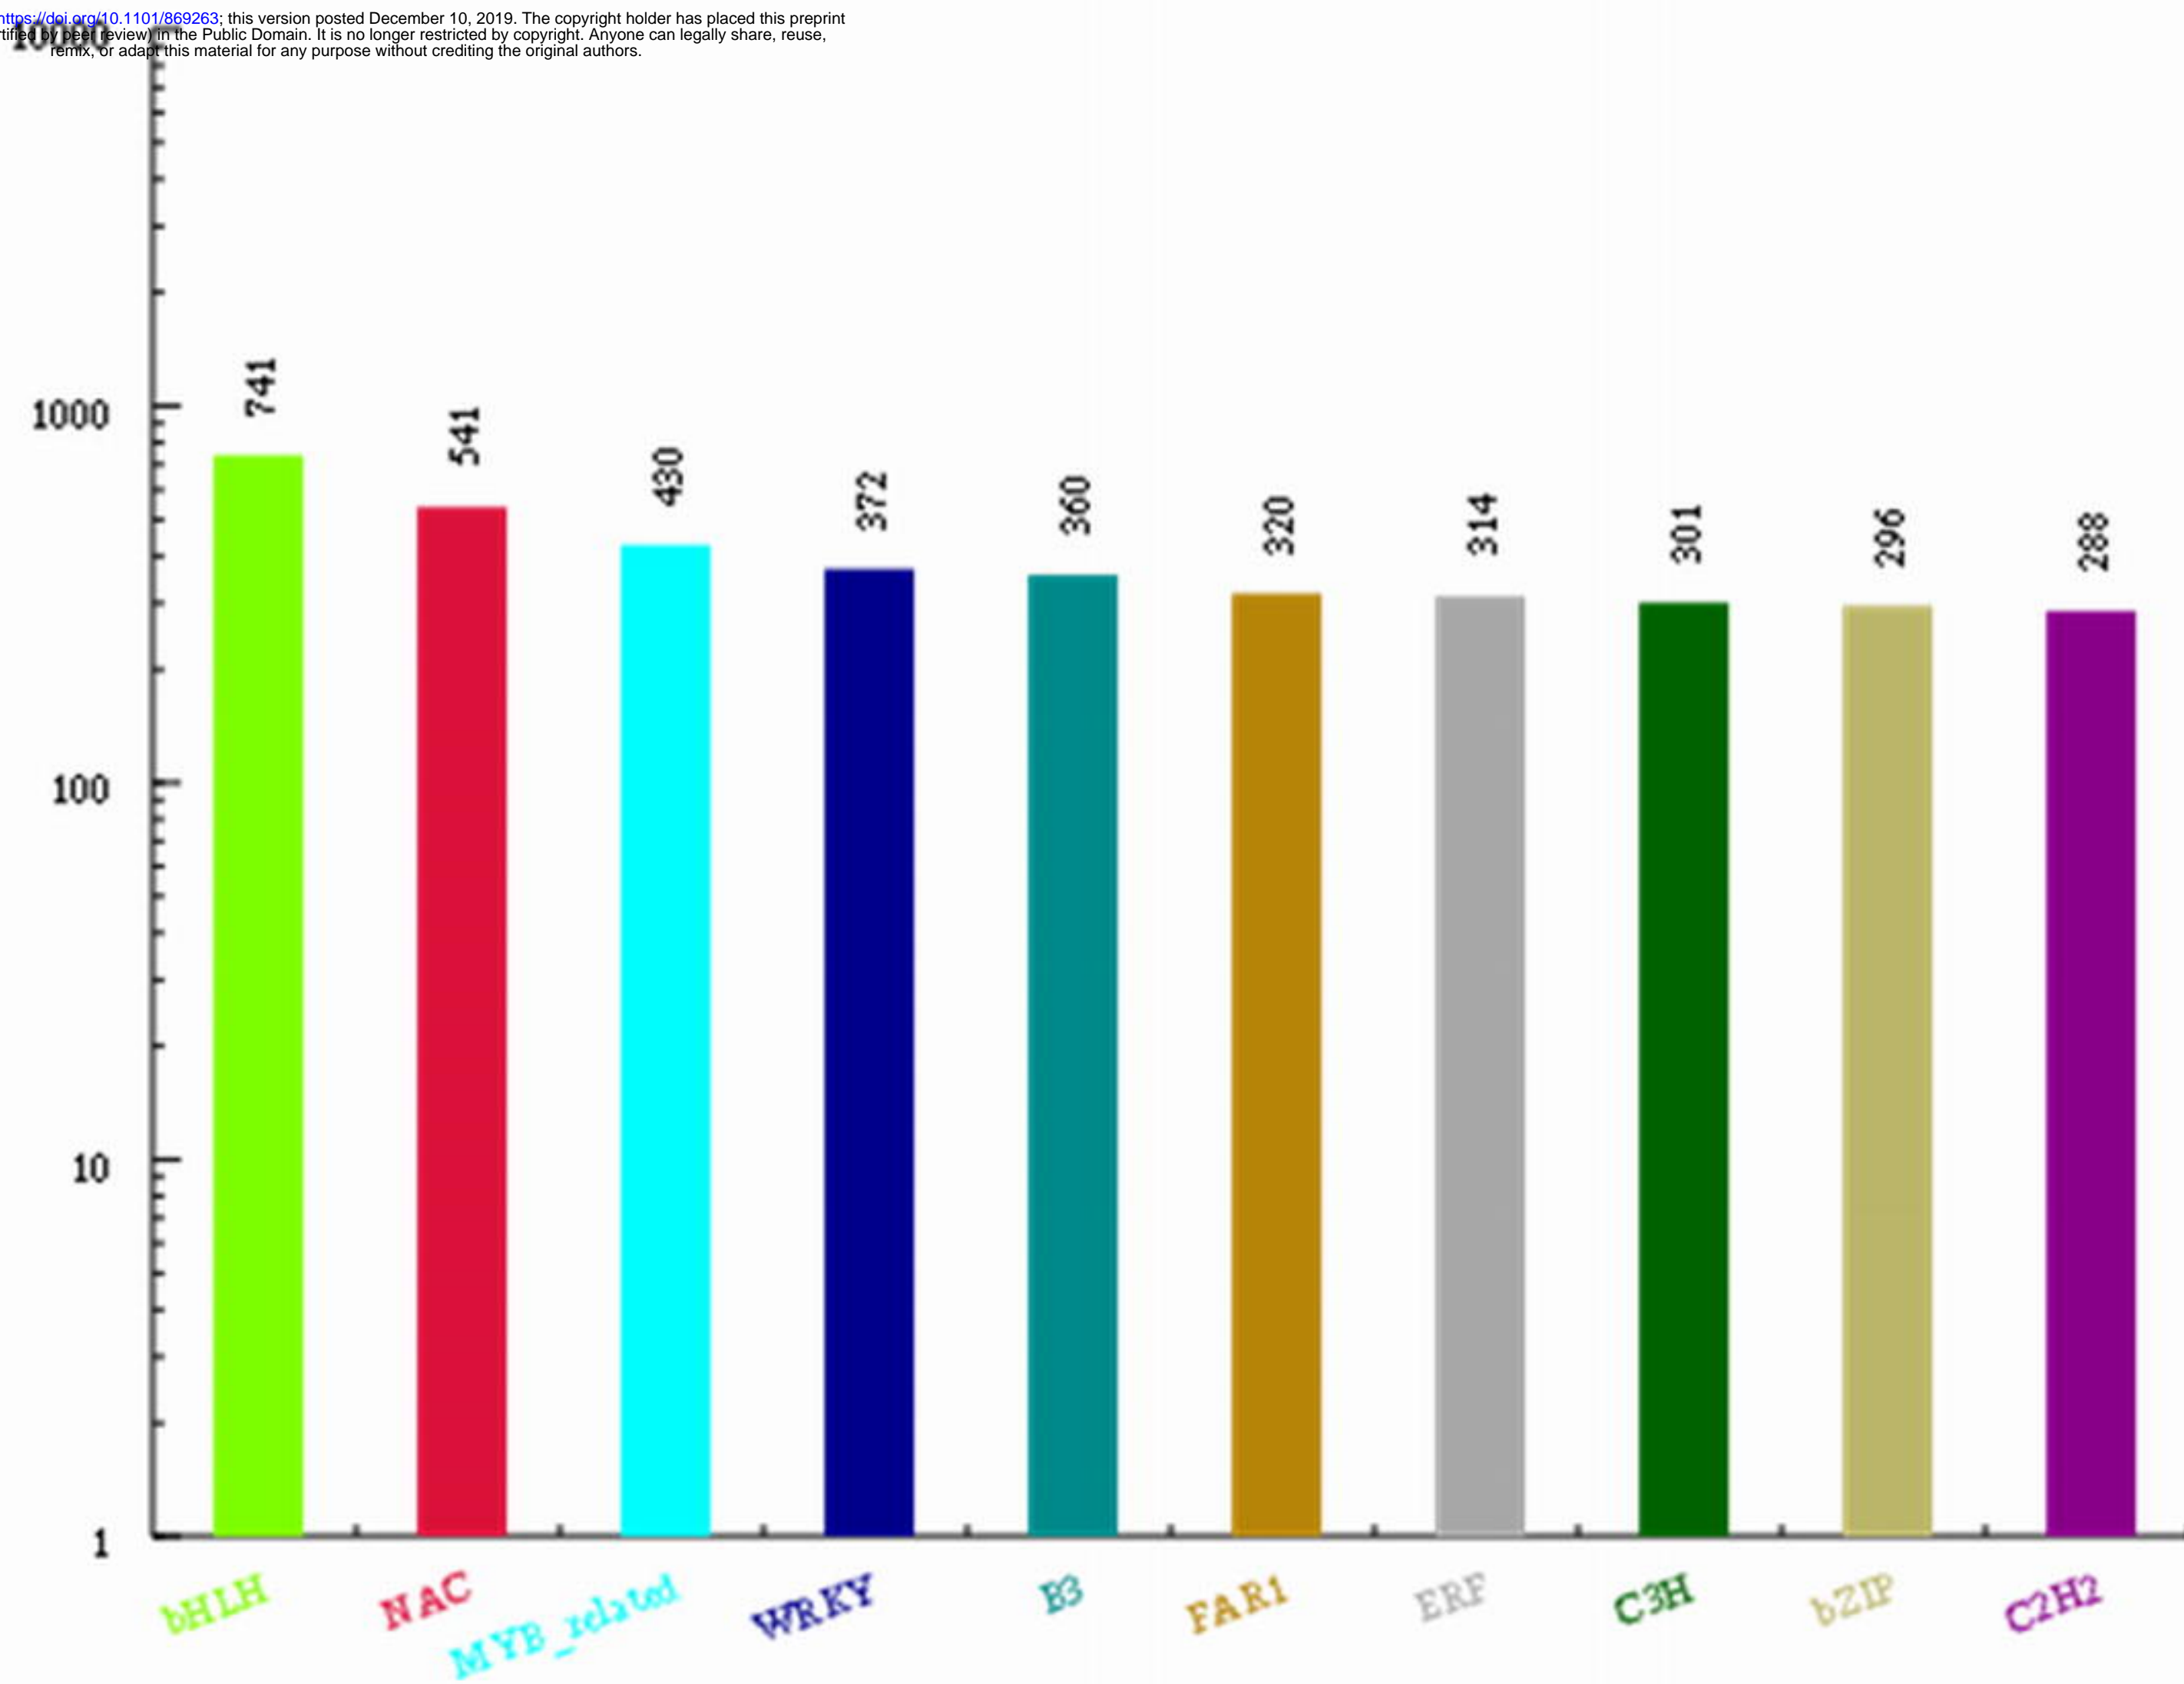

Source: https://www.biorxiv.org/content/10.1101/869263v1.full.pdf
